1 **Transcriptional re-wiring by mutation of the yeast Hsf1 oligomerization domain**

2 Elizabeth A. Morton<sup>1\*</sup>, Michael W. Dorrity<sup>1\*</sup>, Wei Zhou<sup>1</sup>, Stanley Fields<sup>1,2†</sup>, Christine Queitsch<sup>1†</sup>

3 <sup>1</sup> Department of Genome Sciences, University of Washington, Seattle, WA 98195

4 <sup>2</sup> Department of Medicine, University of Washington, Seattle, WA 98195

5

6 \* These authors contributed equally to this work

7 † Correspondence to: Stanley Fields ([fields@uw.edu](mailto:fields@uw.edu)) and Christine Queitsch ([queitsch@uw.edu](mailto:queitsch@uw.edu))

8

9

10

11

12

13

14

15

16

17

18

19

20 **Abstract:** Response to heat stress is mediated by heat shock transcription factors (HSFs), which  
21 possess conserved DNA-binding and oligomerization domains. The oligomerization domain is  
22 required for HSF1 to transition under heat stress from a monomer to a homotrimer, which alters  
23 DNA-binding specificity and affinity. Sequence variation in the oligomerization domain affects  
24 HSF1 activity, although this link is poorly understood. We performed a deep mutational scan of  
25 >400,000 variants of the oligomerization domain of *Saccharomyces cerevisiae* Hsf1 and  
26 measured fitness under stress and non-stress conditions. We identify mutations that confer  
27 temperature-specific phenotypes; some exceptional Hsf1 variants lead to enhanced growth under  
28 heat stress and changes to *in vivo* DNA-binding and transcriptional programs. The link between  
29 Hsf1 oligomerization and DNA-binding domain is evolutionarily conserved, with co-evolving  
30 residues between these domains found among fungi. Mutation of transcription factor  
31 oligomerization domains may represent a path toward re-wiring transcriptional programs without  
32 mutation of DNA-binding domains.

33

34

## 35 **Introduction**

36 The heat shock transcription factor (HSF1) is the central regulator of heat shock-inducible gene  
37 expression and the cytoplasmic unfolded protein response in eukaryotes. HSF1 has two highly  
38 conserved domains, mediating DNA-binding and oligomerization.<sup>1,2</sup> In standard models of HSF1  
39 regulation, the protein is predominantly monomeric and inactive in the absence of stress. Upon  
40 stress exposure, HSF1 becomes post-translationally modified and trimerizes into an active state  
41 that upregulates heat shock target genes.

42 Despite half a century of study, the mechanisms by which HSF1 functions in the cell are not well  
43 characterized beyond this simple model. HSF1 is essential in many model organisms, including  
44 *C. elegans*, *D. melanogaster*, *S. pombe* and *S. cerevisiae*.<sup>3-7</sup> Beyond regulating heat shock, HSF1  
45 contributes to development and fertility,<sup>3-5,8,9</sup> aging,<sup>10</sup> cancer,<sup>11-14</sup> innate immunity,<sup>15,16</sup> and  
46 metabolism.<sup>17-20</sup> Consistent with these multiple roles, the transcriptional programs mediated by  
47 HSF1 differ in stress and non-stress conditions.<sup>12,21,22</sup> The HSF1 DNA-binding domain is  
48 remarkably conserved, showing few changes from yeast to humans. Though initial studies of *S.*  
49 *cerevisiae* Hsf1 suggested it is constitutively trimerized and bound to DNA,<sup>7</sup> more recent studies  
50 indicate that Hsf1 substantially increases its target occupancy upon heat shock, similar to higher  
51 eukaryotes in its temperature-dependent regulation of DNA binding.<sup>23,24</sup>

52 Beyond regulating homotrimerization, the HSF1 oligomerization domain mediates other inter-  
53 and intramolecular interactions.<sup>25-31</sup> Others have proposed that oligomerization of HSF1 can  
54 affect specificity of DNA binding,<sup>28,32</sup> and in yeast, oligomerization-defective phenotypes can be  
55 suppressed by mutation in the DNA-binding domain.<sup>28</sup> The oligomerization domain of HSF1 is  
56 characterized by hydrophobic residues with heptad periodicity. Although this domain is

57 commonly depicted as a single continuous domain, a region in the middle deviates from the ideal  
58 hydrophobic heptad repeat, although it maintains the periodicity of the flanking N- and C-  
59 terminal regions. Interruption of the hydrophobic pattern by this region, which we refer to as the  
60 HR-spacer, initially suggested that the oligomerization domain contains two distinct  $\alpha$ -helices  
61 (HR-A and HR-B).<sup>33,34</sup> *In vitro* studies of Hsf1 protein have shown that HR-A and HR-B show  
62 differences in conformational change upon heat shock.<sup>26</sup>

63 We present here a deep mutational scan of a region of the oligomerization domain of *S.*  
64 *cerevisiae* Hsf1 that includes the C-terminus of HR-A, the HR-spacer, and most of HR-B. This  
65 comprehensive sequence–function map of more than 400,000 variants allowed us to expand on  
66 the role of this domain in DNA binding. Mutation of the oligomerization domain alone is  
67 sufficient to alter both target binding and the downstream composition of its transcriptional  
68 program. We identify a small subset of sites that can be mutated to confer exceptional stress  
69 resistance, with the stress-resistant mutants showing a loss of temperature-dependent repression  
70 of a subset of genes within the Hsf1 transcriptional program. These results suggest an  
71 unexpected evolutionary path to tailor the activity of a transcription factor for different  
72 environments by changing its oligomerization domain to regulate DNA binding rather than  
73 changing the DNA-binding domain itself.

## 74 **Results**

### 75 **Natural variation in the HR-A/B oligomerization domain affects fitness in a temperature-** 76 **specific fashion**

77 In the consensus model of Hsf1 regulation, Hsf1 trimerizes upon heat stress and binds to heat  
78 shock elements (HSEs) to promote target gene expression (Fig. 1A). *S. cerevisiae* Hsf1

79 (schematic in Fig. 1B) is essential at both basal (30°C) and heat stress (37°C) temperatures, with  
80 increasing temperature accompanied by shifts in oligomeric state and changes in target  
81 specificity.<sup>23,35</sup> The oligomerization domain of the yeast protein is comprised of HR-A (heptads  
82 1-5, residues 344-378); HR-spacer (heptads 6-7, residues 379-392); and HR-B (heptads 8-9,  
83 residues 393-403) (Fig. 1E).

84 To better understand how sequence variation in the oligomerization domain contributes to Hsf1  
85 function, we first sought to identify patterns of sequence conservation among natural  
86 oligomerization domain variants, and to test the effects of natural oligomerization variants via  
87 domain swap experiments. We analyzed conservation of residues according to their predicted  
88 helix position in the triple-stranded coiled-coil trimer model. In the seven-residue periodicity  
89 (conventionally labeled *a* through *g*), the core *a* and *d* positions form the hydrophobic face that  
90 mediates coiled-coil interactions of the trimer.<sup>33,36,37</sup> Like others,<sup>33,38,39</sup> we observed stronger  
91 conservation of these core positions compared to other helix positions (Fig. 1C). As exceptions,  
92 some species show variation even at core positions, and nearly all species show a break in  
93 conserved hydrophobic amino acids at these sites within the HR-spacer (Fig. 1D, S1A). The lack  
94 of hydrophobic residues in core positions of the HR-spacer and conservation of hydrophobics  
95 outside of the core positions in HR-B suggest that these regions may encode functions beyond  
96 forming the canonical coiled-coil required for survival under heat stress.

97 To test if variation in this domain alone could alter the temperature-specific function of Hsf1, we  
98 replaced the *S. cerevisiae* oligomerization domain (residues 342-403) with the oligomerization  
99 domains of six fungi predicted to vary in trimerization propensity (Fig. 1E, S1B). The chimeric  
100 Hsf1 proteins were tested at 30°C and 37°C for their ability to mediate *S. cerevisiae* growth in a  
101 yeast background in which the endogenous *Hsf1* was regulated to allow repression by a

102 tetracycline derivative, anhydrotetracyclin (ATc). Substitution of the *S. cerevisiae*  
103 oligomerization domain with one from another species altered growth rate in a temperature-  
104 specific manner. At basal temperature, all oligomerization domains rescued *S. cerevisiae* Hsf1  
105 function to at least some extent (Fig. 1F). At high temperature, oligomerization domains from  
106 three species that natively grow poorly at this temperature resulted in two (*M. irregularis* and *M.*  
107 *sympodialis*)<sup>40,41</sup> that caused poor growth of *S. cerevisiae*, and another (*C. vishniacii*)<sup>42</sup> that fully  
108 rescued (Fig. 1F). The oligomerization domain of the thermophile *T. appendiculata*<sup>43</sup> did not  
109 confer enhanced growth of *S. cerevisiae* under temperature stress (Fig. 1F). These results suggest  
110 that Hsf1 temperature sensitivity does not depend solely on the oligomerization domain.  
111 Phylogenetic distance of the substituted domains from the *S. cerevisiae* domain does not explain  
112 differences in phenotype (Fig. 1E), suggesting that specific patterns of sequence variation in the  
113 oligomerization domain rather than predicted trimerization propensity influence temperature-  
114 dependent Hsf1 function.

115

### 116 **Deep mutational scanning of the Hsf1 HR-A/B domain**

117 Because variation in the Hsf1 oligomerization domain influences temperature-dependent fitness,  
118 we sought to analyze a region of this domain by deep mutational scanning, an approach to  
119 comprehensively interrogate the functional consequences of amino acid substitutions at each  
120 position of a protein. We targeted a 36 amino acid region of the oligomerization domain  
121 (residues 365-400) spanning heptads 4 through 8, a region that includes 14 residues of HR-A, the  
122 intervening 14 residues of the HR-spacer, and 8 residues of HR-B (Fig. 2C).

123 A library of *HSF1* variants was created by doped oligo synthesis, with a 2.5% chance of mutant  
124 base incorporation at any given position. The doped oligos were inserted into a low-copy  
125 plasmid bearing the rest of yeast *HSF1*, and the library was transformed into yeast. Given Hsf1  
126 essentiality (Fig. 2A), we used the strain allowing ATc repression of *HSF1* (Fig. 2B, see  
127 Methods), paired with complementation by a plasmid-encoded *HSF1* variant. Endogenous *HSF1*  
128 expression was permitted during transformation and expansion of the library to reduce selective  
129 pressure before we carried out the mutational screen. Some selection occurred before  
130 endogenous *HSF1* repression, attributable to putative dominant negative mutants, identified as  
131 early drop-outs (Fig. S2). Samples of the plasmid library before and immediately after  
132 transformation, as well as following overnight growth, were collected and included in  
133 downstream sequencing.

134 We carried out competitive fitness selections at three temperatures (30°C, 35°C and 37°C). The  
135 library culture was grown for 4 hours at 30°C in the presence of ATc to repress endogenous Hsf1  
136 (Fig. 2B), and then split into three replicate cultures grown at each of the three temperatures for  
137 14 hours (30°C and 35°C) or 17 hours (37°C) (Fig. 2B). Variant frequency was determined by  
138 high-throughput sequencing of the plasmids isolated from these output cultures and compared to  
139 the frequencies in the initial plasmid library, generating a fitness score. Variants that caused a  
140 fitness defect over the growth interval decreased in frequency compared to wild type, while those  
141 with a fitness benefit increased. Wild-type sequence made up 21.1% of the library. The yeast  
142 library contained 465,531 variants with at least 5 input reads, including 620 of 720 possible  
143 single amino acid changes (Fig. 2B). Correlation in variant scores was high between the three  
144 replicates at each temperature (Table S1). As expected, variants with nonsense mutations led to  
145 severe growth defects (Fig. 2C) and those with synonymous codons formed a distribution around

146 zero (wild-type fitness) (Fig. S3). Mutations to proline were largely as detrimental as stop codons  
147 at all temperatures (Fig. 2C), consistent with an  $\alpha$ -helical structure necessary for Hsf1 function at  
148 both high and low temperatures. We confirmed these fitness results by individually testing eight  
149 strains with variants that conferred a range of growth phenotypes. Growth rates of these strains  
150 relative to a strain bearing wild-type Hsf1 correlated with deep mutational scanning scores (Fig.  
151 2D).

### 152 **Helical structure is a strong signal in the deep mutational scanning data**

153 We compared the mutational scanning data to the predicted  $\alpha$ -helical structure of the  
154 oligomerization domain (Fig. 3A and B). Substitutions at the *a* and *d* positions, particularly to  
155 small or charged residues that cannot mediate hydrophobic interactions, decreased fitness (Fig.  
156 3A and B) at both 30°C and 37°C. This effect was not observed at the other positions (Fig. S4),  
157 with the exception of position *c*, which displayed sensitivity at 30°C to small or charged residues  
158 (Fig. 3B). The effect of helix position was also evident in double mutants: variants with  
159 combined mutations at *a* and *d* positions performed worse than those at random pairs of helix  
160 positions (Fig. S5A, S5B). We used double mutants to calculate pairwise epistasis scores  
161 between positions within the oligomerization domain. Sites enriched for epistatic interactions  
162 differed between the 30°C and 37°C conditions (Fig. S5C, S5D), supporting the idea of different  
163 conformational constraints in Hsf1 upon heat stress. The observation that sites contributing to  
164 trimeric structure are similarly sensitive to mutation at 30°C and 37°C suggests that the  
165 difference in Hsf1 regulation at these temperatures may be due to more subtle changes in the  
166 degree of trimerization, or to a mechanism other than increased trimerization, such as altered  
167 intramolecular or intermolecular interactions.



168 We examined the effect of proline mutations specifically in the HR-spacer. Although all single  
169 mutations to proline in this region were detrimental, consistent with a required  $\alpha$ -helix, prolines  
170 at some positions were less deleterious in the presence of a second mutation (Fig. 3C). Most  
171 functional proline-containing double mutants have at least one residue located in the HR-spacer,  
172 heptad 7 (Fig. 3D). We validated the ability of a substitution to a canonical hydrophobic residue  
173 in HR-A (N372I, position *a*) to rescue a proline substitution (A392P) in HR-spacer. Although  
174 A392P resulted in a 40% growth defect relative to wildtype, addition of N372I eliminated this  
175 growth defect almost entirely (Fig. 3E). The observation that the effects of proline mutations can  
176 be reversed more readily in the HR-spacer than elsewhere suggests that the requirement for  
177 helical structure is relaxed in this region of the oligomerization domain, consistent with distinct  
178 functions of this domain beyond coiled-coil formation.

179

### 180 **Exceptional Hsf1 variants increase fitness under temperature stress**

181 A small class of variants led to a growth benefit compared to wild type at 37°C (Fig. 4A). We  
182 regenerated seven of these variants, including six double mutants (Fig. 4C), and assayed their  
183 effect on growth rate. The individual variants conferred growth rates up to 20% higher than wild  
184 type at 37°C, but less so at 30°C. One variant did not reproducibly confer the increased growth  
185 rate (Fig. S6A). We selected two of the variants, A382C and the double mutant M380K, M381I,  
186 for further characterization and found they also conferred enhanced growth under a different  
187 proteotoxic stress, exposure to ethanol (Fig. S7). We engineered a subset of the variants into the  
188 endogenous *HSF1* locus but observed no significant growth rate increase (Fig. S6B), likely a

189 result of the better growth of yeast expressing *HSF1* alleles from the chromosome than from  
190 plasmids in the tet-off background.

191 Several of the mutations in the six validated variants lie between residues 380-387 in heptads 6  
192 and 7. For the top variants conferring enhanced growth (enrichment scores >1.5sd higher than  
193 mean at 37°C), we tallied the helix positions at which mutations were present. Mutations at the  
194 predicted helix interface (position *d*) were severely depleted (Fig. 4B). However, mutations at  
195 positions *b* or *c*, predicted to be facing outward from the helix, were over-represented (Fig. 4B).  
196 Over the five heptad repeats that were mutagenized, residue 366 (in the fourth heptad) and  
197 residues 380 and 381 (in the sixth heptad) contributed the strongest signal of any *b* and *c*  
198 positions (Fig. 4D, M381 marked with “+”).

199 Although the pattern of many of the hydrophobic changes associated with the stress-resistant  
200 phenotype is consistent with a trimerized Hsf1, notable exceptions to the *a* and *d* periodicity  
201 occurred in heptad 4 and in the HR-spacer and HR-B. The abundance and location of these  
202 variants in the HR-spacer indicate that this region contributes to regulation of stress response by  
203 Hsf1.

204

### 205 **Loss of temperature-dependent regulation at a small set of transcriptional targets is** 206 **associated with stress resistance of exceptional Hsf1 variants**

207 We hypothesized that some of the mutations that conferred stress-resistant phenotypes altered the  
208 expression level, regulation or identity of Hsf1 target genes. Thus, we performed RNA-  
209 sequencing on two strains with variants that improved growth at 37°C (M380K, M381I and

210 N369Y,E373K) and two independent strains expressing wild-type *HSF1*. Samples were collected  
211 soon after exposure to heat (30°C or 37°C for 15min or 2 hours; see Methods) or just before  
212 temperature shift but after endogenous *HSF1* repression (“+ATc”).

213 Transcriptional profiles of the two improved-growth variants showed high similarity to each  
214 other in genes differentially expressed compared to wild type at 37°C (Fig. S8), prompting us to  
215 pool the variants for analysis. There were few differences in gene expression between variants  
216 and wild type at the 15min timepoint; however, significant differences were observed at the 2  
217 hour timepoint at both temperatures (Fig. 5A, 5B). Unexpectedly, those genes with significant  
218 upregulation at 37°C in the variants relative to wild type overlapped those with significant  
219 downregulation at 30°C (Fig. 5B, 5E, Table S3). Thus, the primary pattern of differentially  
220 expressed genes in the variants is the loss of temperature-specific regulation and maintenance of  
221 an intermediate expression level of these genes relative to wild-type yeast (schematic drawing in  
222 Fig. 5E inset). The exceptional *Hsf1* variants showed neither constitutive nor over-expression of  
223 genes induced in the canonical heat shock response, either of which could plausibly confer  
224 increased stress tolerance (Fig. S9A, S9B). Instead, the variants failed to downregulate a set of  
225 genes – largely involved in cell wall, metabolism, Golgi-associated vesicles and cytoplasmic  
226 stress granules – in a temperature-dependent manner (Fig. 5F, Table S4). The most highly  
227 differentially expressed gene between variants and wild type at 37°C, *DED1*, encodes a protein  
228 that is globally required for yeast mRNA translation initiation and localizes to the stress granule  
229 (Fig. 5B).

230

231 **Mutations in the HR-spacer domain alter *Hsf1* binding targets**

232 To understand how mutations of the Hsf1 oligomerization domain, especially in the HR-spacer,  
233 result in altered transcriptional profiles, we compared the DNA-binding patterns of strains with  
234 wild-type Hsf1 or variants. The canonical Hsf1 binding motif, the heat shock element (HSE),  
235 consists of three tandem inverted repeats of the sequence nGAAn. HSEs vary in the number and  
236 spacing of these triplet repeats among HSF1-bound genes,<sup>12,23,28</sup> making oligomerization state a  
237 possible mechanism to differentiate among HSF1 targets.

238 To characterize variant Hsf1 DNA binding, we employed the calling card method.<sup>44,45</sup> In this  
239 method, *in vivo* expression of a fusion between a transposase and a transcription factor tags sites  
240 bound by the factor via transposon insertion events. Each event is molecularly barcoded so that  
241 independent binding events can be quantified. To examine changes in the sites bound under  
242 temperature stress, we applied the calling card method to wild-type Hsf1 as well as to the stress-  
243 resistant variant M380K,M381I, which falls in the HR-spacer region. Analysis of sequences  
244 flanking (150bp) transposition insertions by AME assessment identified two different types of  
245 HSEs among significantly enriched motifs at 37°C (Table S5). These two different types of  
246 HSEs (Type I, the canonical HSE, and Type II, also known as a step-type HSE<sup>46</sup>) exhibited  
247 different enrichment among target binding site sequences of wild-type Hsf1 and M380K,M381I  
248 (Fig. 5D and Table S5). *De novo* motif identification also found differences in significantly  
249 enriched motifs between M380K,M381I and wild type (Table S6). We conclude that a subset of  
250 the Hsf1 targeting profile remained intact in M380K,M381I, but some types of sites, particularly  
251 those with type II HSEs, differed.

252 We also identified the nearest gene on either side of each insertion site. Of genes associated with  
253 calling-card insertion sites, there are 131 targets in common between 37°C wild type and  
254 M380K,M381I, enriched for GO biological processes of protein folding and response to heat and

255 enriched for HSF binding motifs (Fig. 5C, Table S7, Table S8). There are 29 genes annotated as  
256 Hsf1 targets (a significant overlap), including *HSP70* (*SSA1*, *SSA2*, *YBR169C*), HSP90 complex  
257 (*HSP82*, *SSE1*), and co-chaperones (*YOR007C*, *YFL016C*) (Table S7). Wild type and  
258 M380K,M381I showed 542 genes and 212 genes unique to them, respectively (Table S7). To be  
259 inclusive in assignment of these gene lists, we included the closest gene on both sides of the  
260 insertion site. We interpret these results as evidence that mutations of the Hsf1 oligomerization  
261 domain can alter the binding specificity of Hsf1.

262 However, we did not observe significant overlap between the differentially expressed genes  
263 identified by RNA-seq and the genes residing near the insertion sites. For M380K,M381I at  
264 37°C, the upregulated genes (205 genes) overlap with the calling card genes (343) by only 14  
265 genes. For wild type at 37°C, the upregulated genes (401) overlap with the calling card genes  
266 (673) by only 43 genes, and the downregulated genes (861) overlap with the calling card genes  
267 by 124 genes. Other studies have also observed discrepancy between transcription factor binding  
268 sites and gene expression,<sup>47-49</sup> attributable to such complexities of gene regulation as long-range  
269 interactions, expression changes in genes that are not direct Hsf1 targets, and the necessary but  
270 not sufficient nature of transcription factor binding.

271

## 272 **Natural variation in the Hsf1 oligomerization domain is consistent with its role in altering** 273 **transcriptional targets**

274 In light of our observation that yeast fitness can be modulated by mutations in the *HSF1*  
275 oligomerization domain, we examined natural variation in this domain in yeast species capable  
276 of growing under temperature stress. Using growth data for 785 industrial yeast species,<sup>50,51</sup> we

277 identified nine thermophiles (capable of growth at 40°C or above) with available sequence data  
278 (Table S9). Residue 381, in which mutation can enhance growth under stress, shows altered  
279 amino acid preference among the nine thermophiles (Fig. 6A), with a 7-fold enrichment of  
280 hydrophobic amino acids compared to background; the consensus residue among non-  
281 thermophilic fungi was alanine ( $p = 0.005$ ). As residue 381 lies within the HR-spacer (heptad 6,  
282 position *c*), a hydrophobic residue would not be expected to contribute to trimerization (Fig. 1C).  
283 To test if the HR-spacer showed expected patterns of intramolecular interactions, we examined  
284 within-domain co-evolution between heptads of the oligomerization domain across 1229 species  
285 of fungi. The trimeric coiled-coil structure predicts that heptads share co-evolving residues due  
286 to the conserved function of its quaternary structure. Consistent with this expectation, we find  
287 co-evolving sites within the same or adjacent heptad for all heptads except heptads 1 and 3 (Fig.  
288 S10B); the assumed structure of the Hsf1 trimer as an extended coiled-coil does not predict  
289 longer range contacts than these. Nevertheless, we find co-evolution of heptad 4 (HR-A) with  
290 both heptads 8 and 9 (HR-B), which extend over the HR-spacer. Co-evolution between residues  
291 distant in primary sequence can indicate physical or functional links.

292 Because transcription factors typically regulate target specificity via their DNA-binding  
293 domains, we would predict co-evolution between the Hsf1 DNA-binding and trimerization  
294 domains if both contribute to target specificity. Indeed, we found that mutations in the  
295 oligomerization domain co-vary with mutations in the DNA-binding domain, consistent with our  
296 experimental findings that mutating the oligomerization domain suffices to alter Hsf1 target  
297 specificity (Fig. 6B, 6C, S10C). We further analyzed co-evolution at the level of individual  
298 heptads in the oligomerization domain but failed to find specific relationships between the HR-

299 spacer or HR-B regions and the DNA-binding domain, suggesting that interaction between these  
300 domains maybe involve the entire oligomerization domain (Fig. 6C).

301

## 302 **Discussion**

303 By characterizing the effects of more than 400,000 variants of Hsf1 on yeast growth in basal and  
304 stress conditions, we found that the oligomerization domain exhibits different mutational  
305 sensitivities in basal and stress conditions, and that patterns of epistasis also vary between these  
306 conditions. These results suggest that altered interactions among individual subunits of the Hsf1  
307 trimer contribute to temperature-specific function (Fig. 6D). Both mutational sensitivity data and  
308 patterns of epistasis point to fewer mutationally-sensitive helix positions at 37°C, consistent with  
309 a rigid, trimeric coiled-coil. In contrast, unexpected mutational sensitivity on the outer helix face  
310 and a more complex pattern of epistatic interaction at 30°C suggests that the functional Hsf1  
311 unit, while trimeric, may depend on additional residues in the outer helix face for complete  
312 activity (Fig. 6D). Additionally, we identified exceptional variants in this domain that confer  
313 enhanced growth at 37°C, a phenotype accompanied by changes in transcriptional program and  
314 DNA targeting (Fig. 6E). Many of these variants are double mutants, such as M380K,M381I, for  
315 which the single composite mutations alone did not confer the 37°C benefit in the screen (Fig.  
316 2C). We propose that the HR-spacer and HR-B have an activity in addition to mediating trimer  
317 formation. The exceptional variants appeared to have lost temperature-dependent regulation –  
318 either directly or through an indirect target – of a suite of genes involved in metabolic processes,  
319 transport, cell wall and cytoplasmic stress granules, likely due to the link between DNA-binding  
320 domain variation and oligomerization domain variation. In this case, the variants have resulted in

321 cells that maintain an intermediate expression level that does not change under stress, suggesting  
322 loss of temperature-dependent regulation underlies their stress-resistant phenotype. We predict  
323 that these specific mutations would not be beneficial under other conditions, such as a fluctuating  
324 environment. The prevalence of HSF1 gene duplications, especially in plant species, allows the  
325 exploration of novel regulatory programs by introducing variation in other copies. Indeed,  
326 variable length (in residue multiples of seven) of the HR-spacer has been used to distinguish  
327 between classes of HSFs present in plants.<sup>52</sup>

328 It is possible that mutations at non-canonical positions in the HR-spacer or HR-B affect Hsf1  
329 function through intra-molecular interaction. This model is also consistent with studies noting  
330 that HR-B may act repressively in Hsf1 functional assays.<sup>34,53,54</sup> It is also possible that the  
331 variants that confer exceptional growth promote a different multimerization state. Hsf1 occurs in  
332 oligomeric states higher order than a trimer; *Drosophila* HSF has long been considered  
333 hexameric in its active state, with hydrophobic residues in HR-B in a register one removed from  
334 the main register possibly involved.<sup>38</sup> These data also do not rule out altered interactions of other  
335 regulators of Hsf1 or disrupted post-translational modification.

336 While re-wiring the Hsf1-dependent stress-responsive regulatory network may be advantageous  
337 under some conditions, maintaining the core heat-stress program is necessary for survival (Fig  
338 6D). Similar rewiring of the Hsf1 transcriptional program has been observed in cancer cells,  
339 where Hsf1-dependent regulation and translation and metabolism genes drive cell growth in a  
340 way that is distinct from heat stress-dependent regulation.<sup>12,55</sup> There are parallels between the  
341 effects seen in cancer cells and those we observe: changes to Hsf1 regulation have led to a “pro-  
342 survival” phenotype that emphasizes cell growth even in the presence of a strong stress signal.



343 We suggest that more subtle changes to the Hsf1 regulatory network can be made through  
344 mutations in the trimerization domain than through mutations in the DNA-binding domain itself.  
345 Hsf1 has flexibility in recognition of its DNA-binding site, with different spacings between  
346 frequently degenerate GAA motifs.<sup>32,46,56</sup> For this reason, the potential set of binding targets for  
347 Hsf1 is large compared to transcription factors with longer sequence motifs and less variability in  
348 their arrangement. Furthermore, the requirement of a trimeric structure for high-affinity binding  
349 to DNA imposes a constraint on mutations that alter affinity for DNA; the binding affinity  
350 consequence of any single change to the DNA-binding domain is three-fold in the Hsf1 trimer.  
351 Nevertheless, re-wiring of transcriptional networks is rampant in evolution, and altering the  
352 transcriptional targets of Hsf1 would be especially advantageous in changing how specific sets of  
353 genes are regulated by temperature. Changes to the oligomerization domain may represent a  
354 more viable path toward subtly altering transcriptional targets of Hsf1 (Fig. 6D) without overtly  
355 compromising the underlying heat shock response. The possibility that new transcriptional  
356 options are exposed by modification of the oligomerization domain has broader implications for  
357 the many ways in which species can adapt transcription factor function over evolutionary time.<sup>57–</sup>  
358 <sup>61</sup>

359

## 360 **Methods**

361 *Deep mutational scan of S. cerevisiae HSF1 oligomerization domain.*

362 The *HSF1* gene of *S. cerevisiae* was cloned under its native promoter (664bp upstream of the  
363 start codon through 693bp downstream of the stop codon, see Table S10) into vector pRS415  
364 (*LEU2* selection).<sup>62</sup> In order to facilitate large scale library cloning, silent restriction enzyme

365 sites were introduced on either end of the target region - AvrII (CCTAGG) at base pairs 1041-  
366 1046 and Bpu10I (GCTTAGG) at base pairs 1244-1250 – to generate plasmid pEM74. The  
367 region targeted for mutagenesis was base pairs 1093-1200 of the *HSF1* coding sequence. A  
368 doped oligo library of 168 bases was ordered (TriLink Biotechnologies) containing 30 bases of  
369 invariant flanking sequence on either side of the 108 bases of the doped target region (2.5% base  
370 misincorporation). pEM74 was digested sequentially for 7.5hr each with AvrII and Bpu10I and  
371 purified (Zymo Clean & Concentrator D4003) to generate the vector component in which to  
372 clone the doped oligo library. Flanking sequences in the doped oligo library were extended with  
373 primers to increase overlap with the digested pEM74 (Table S10, the library was amplified with  
374 primers EM244 and EM245 for 9 cycles 98°C 15sec, 60°C 15sec, 70°C 15sec). Gibson assembly  
375 (NEB #E2611S) was employed to insert the amplified library into the AvrII- and Bpu10I-digested  
376 pEM74. The ligated variant library was cloned into DH10B cells (Invitrogen 18290015), grown  
377 in bulk, purified, and transformed using lithium acetate (see below) into tet-off *HSF1* yeast  
378 (KanMX::tetO::minpromoter::HSF1; URA3::CMV::tTA; his3-1; leu2-0; met15-0; MATa).<sup>63</sup> Post-  
379 transformation, the yeast library was recovered overnight in 400mL C-Leu media, concentrated,  
380 and frozen in 25% final concentration glycerol.

381 The yeast library was subjected to selection and screening conditions as follows. One hundred  
382 milliliters of C-Leu media was inoculated with  $\sim 1.2 \times 10^8$  cells of frozen yeast library stock and  
383 grown at 30°C overnight. The culture was back-diluted to 100mL of OD600 0.45, at which point  
384 the remaining overnight culture was pelleted and frozen as "overnight" timepoint. The back-  
385 diluted culture was grown at 30°C for 2hr, anhydrotetracycline (ATc) (Sigma-Aldrich 37919-  
386 100MG-R) was added to 0.1µg/mL, and the culture was grown at 30°C for another 4hr. The  
387 culture was diluted to OD600 0.04 in three flasks of 100mL C-Leu + 0.1µg/mL ATc. A sample

388 was taken as the "+ATc" timepoint. Flasks were put shaking at 200rpm at temperatures 30°C,  
389 35°C, or 37°C and grown 14.5hr (37°C was grown 17.5hr). After growth, the 100mL cultures  
390 were spun down and pellets were frozen as post-selection timepoints.

391 Plasmids were extracted from pre- and post-selection libraries, as well as a sample from the  
392 frozen library stock, using the Zymoprep Yeast Plasmid Miniprep II kit (D2004). These  
393 minipreps were treated to remove genomic DNA contamination with combined Exonuclease I  
394 (NEB M0293L) and Exonuclease III (NEB M0206L) for 30 min at 37°C, followed by heat  
395 inactivation at 95°C for 2 minutes.

396 Each plasmid miniprep sample was amplified by Phusion (NEB M0530L) to generate libraries of  
397 the mutagenized HSF1 region flanked by cluster generating Illumina adaptors. Each sample was  
398 amplified with a different index sequence in the primers for subsequent demultiplexing (Table  
399 S10). Library amplified products were 320bp (including adaptor sequence). Following  
400 amplification, libraries were Zymo Clean & Concentrator purified (Zymo Research D4003),  
401 eluting in 15L of nuclease-free water. Libraries were quantified with Qubit high sensitivity  
402 (Invitrogen Q32854) and diluted to 2nM. Final library denaturation and dilution was performed  
403 as described (NextSeq Denature and Dilute Libraries Guide 15048776 Rev. D). Libraries were  
404 sequenced with a NextSeq High v2 300 Cycle kit (FC-404-2004), allowing full paired end  
405 coverage of the 108bp mutagenized region.

406

407 *Analysis of deep mutational scanning data.*

408 Using ENRICH software, read counts for each variant before (input) and after selection (output)  
409 were used to determine fitness of *HSF1* variants. Briefly, counts for a particular variant in the  
410 input and output libraries were normalized by their respective read depths to determine  
411 frequency in each, and a ratio of the output and input frequencies determine a variant's  
412 functional score. Finally, enrichment scores are normalized by the enrichment of wild-type Hsf1  
413 in each selection. Intramolecular epistasis scores (as in S5C) were calculated for all double  
414 mutants where constituent single mutants were tested; the value of epistasis is defined as the  
415 deviation of double-mutant's fitness score from the multiplied scores of its constituent singles.  
416 Negative epistasis scores indicate that a mutation's effect is exacerbated by the presence of a  
417 partner mutation, while positive epistasis scores indicate that a mutation's effect is diminished by  
418 the presence of a partner mutation. Analyses of mutational frequencies (as in Fig. 4D) that  
419 include single, double and higher order mutants were completed by comparing two sets of  
420 trimerization sequences: 1. A query set ranked by fitness scores (fitness >1.5 standard deviations  
421 above mean 37°C fitness for Fig. 4D) 2. A background set with neutral fitness scores (within 0.5  
422 standard deviations of the mean in Fig. 4D). Within each set, we calculate the frequency of each  
423 amino acid at each site to generate a frequency matrix. Enriched amino acid changes in the query  
424 set are identified by calculating the ratio of the query set's frequency matrix to the background  
425 set's matrix.

426

#### 427 *Analysis of HSF1 HR-A/B oligomerization domain conservation in fungal sequences*

428 Using fungal genomes deposited into NCBI and from the fungal sequencing project at Joint  
429 Genome Institute, we created a BLAST database of translated coding sequences and queried with  
430 the *S. cerevisiae* Hsf1 protein sequence. Full protein sequences from BLAST hits (1,229) were

431 aligned using MUSCLE<sup>64</sup> and used to determine conservation at each site in the mutated  
432 segment. Plots showing relative conservation of each amino acid per site were generated with  
433 Weblogo.<sup>65</sup> Co-evolving pairs of sites were identified using the MISTIC<sup>66</sup> tool, wherein mutual  
434 information is calculated between amino acid identities at all site pairs.

435

436 *Cloning of HSF1 variants.*

437 Point mutations identified from the DMS were introduced into pEM74 by the following method:  
438 inverse PCR was performed on plasmid pEM74 with primers that amplified outside the region of  
439 the desired nucleotide change. Gibson assembly (NEB #E2611S) was then performed with the  
440 inverse PCR and a 60-base oligo containing each desired mutation (Table S10 for inverse PCR  
441 primers and oligos, along with the list of all mutants independently cloned outside of the library).  
442 All clones were confirmed with Sanger sequencing. *HSF1* variant clones were then transformed  
443 into the tet-off *HSF1* strain<sup>63</sup> by “one-step” transformation. “One-step” transformation: 1mL of  
444 saturated culture was pelleted, and 1 $\mu$ L of plasmid DNA (approximately 200-400ng) added to  
445 the pellet, followed by 75 $\mu$ L of one-step buffer [0.1M lithium acetate, 38% PEG-3350, 0.1M  
446 DTT, 0.5mg/mL carrier DNA (Roche 1467140)], after which the cells were vortexed, incubated  
447 in a 42°C water bath for one hour, and plated on C-Leu selection plates. The  $\Delta$ tri mutant was  
448 created by ligation (using KLD enzyme mix NEB E0554S) of an inverse PCR that omitted the  
449 HR-A/B domain (amino acids 342-403) (Table S10 for inverse PCR primers).

450 *S. cerevisiae* HR-A/B domain (amino acids 342-403) were replaced with HR-A/B domains of  
451 other fungal species by inverse PCR and Gibson assembly with synthesized gBlocks of the  
452 domains (Table S10). The HR-A/B amino acid coordinates of the species used: *Cryptococcus*

453 *vishniacii*(510-571), *Mucor irregularis* (305-366), *Malassezia sympodialis*(142-203),  
454 *Microsporungypseum* (99-160), *Thielaviaappendiculata* (288-349), *Chalara longipes* (314-375).

455

456 *Growth validation assays of HSF1 variants.*

457 Variants identified in the DMS were validated in a plate reader growth assay. *HSF1* variants  
458 expressed under the native *S. cerevisiae* promoter on a pRS415 backbone were transformed into  
459 a background of tet-off *HSF1* (see above). Strains were cultured overnight at 30°C in C-Leu  
460 media and backdiluted in the morning to an OD600 of 0.45. Backdiluted cultures were incubated  
461 at 30°C for 2hr, after which ATc was added to a final concentration of 0.1µg/mL. The cultures  
462 were incubated for another 4hr to allow time for endogenous *HSF1* repression. Strains were  
463 backdiluted in C-Leu+0.1µg/mL ATc to an OD600 of 0.1 in a 200µL volume per well in 96-well  
464 culture plates. Eight technical replicate wells per strain per plate were run. Plates were sealed  
465 with a plate cover and put in a BioTek Synergy HI microplate reader set to 30°C or 37°C. 30°C  
466 and 37°C plates for each experiment were prepared together and run simultaneously on two  
467 different microplate readers. Plates were incubated with orbital agitation for ≥ 23 hr with 660  
468 absorbance readings taken every 10min. Figure 4C represents eight technical replicates of one set  
469 of transformants. An independent set of transformants is presented in supplemental Figure S6A.  
470 The set of variants presented in Figure 2C was performed in tet-off *HSF1* yeast also containing  
471 an *SSA4* promoter driving GFP on a pRS413 backbone and so were cultured in C-Leu-His media  
472 with ATc.

473 Exposure to ethanol stress was performed by growing above plasmid-expressed *HSF1* variants in  
474 a background of tet-off *HSF1* overnight. Cultures were backdiluted to OD600 0.45, grown at

475 30°C for 2hr, after which ATc was added to a final concentration of 0.1 µg/mL and the cultures  
476 were grown for another 4hr. Cultures were back-diluted again to OD600 0.1 in the presence of  
477 0.1 µg/mL ATc and one of the following ethanol conditions: 0%, 5%, 8%, or 10%. As above,  
478 these dilutions were grown in a BioTek Synergy HI microplate reader set to 30°C or 37°C. Four  
479 technical replicate wells were run for each variant and empty vector, and eight technical replicate  
480 wells were run for the wild type Hsf1 plasmid control.

481

#### 482 *Calling card analysis of HSF1 variants*

483 *HSF1* sequence with point mutations were introduced into helper plasmid of PiggyBac-based  
484 transposon system.<sup>45</sup> Each helper plasmid was paired with a donor plasmid containing specific  
485 barcode within transposon. All constructs were confirmed with Sanger Sequencing. Paired donor  
486 plasmid and helper plasmid were transformed into yeast (BY4705 MAT $\alpha$ ) by high-efficiency  
487 lithium acetate transformation.<sup>67</sup> After transformation, cells were collected and put on the  
488 induction plates with galactose. Cells were induced for 5 days in either 30°C or 37°C (heat shock  
489 condition) to express the HSF1-PBase. Cells were then collected, diluted back to OD600=0.45,  
490 and cultured in rich medium for 6 hours recovery (to OD600 $\approx$ 1.6). Cells were put onto  
491 selection plates with 5-FOA and G418 at varying dilutions and grown 2-3 days. Cells were then  
492 collected from selection plates and genomic DNA was extracted from each sample using the  
493 Smash and Grab method as described.<sup>68</sup> Four variants of *HSF1* in addition to wild-type *HSF1*  
494 were expressed for this assay and exposed to 30°C or 37°C in two replicates; all of the *HSF1*  
495 variant-expressing yeast failed to produce enough colonies for collection at 30°C, therefore only  
496 wild type had data for both 30°C and 37°C. Other variants and wild-type had two replicates per  
497 temperature, except A382P 37°C, where a single sample was collected. The library for each

498 group were prepared through the protocol described by the calling card-seq method.<sup>45</sup> The PCR  
499 products were pooled and Illumina sequenced.

500 The raw data included all FASTQ files from the PiggyBac transposase-only control, wild type  
501 HSF1 and the four variants: M380K,M381I (phenotype of enhanced growth at 37°C),  
502 M380I,M381K (mildly enhanced or approximately equal to wild type, Fig. S6A), Q389K (mildly  
503 impaired growth), and A382P (severely impaired growth), two replicates each. In read1, the first  
504 segment is the universal primer sequence: CGTCAATTTTACGCAGACTATCTTTCTAGGG  
505 followed by the flanking genome sequence of 39 bp. The first 8 bp of read2 is the UMI sequence  
506 used to identify unique insertion events. We first filtered sequence reads with high quality and  
507 mapped them back to the yeast genome. Then we quantified independent PiggyBac insertions  
508 based on the UMIs detected in each sample. Target genes were then assigned to insertion peaks  
509 that were within 1000 bp 5' or 200 bp 3' of the transcription start site for that gene.<sup>44</sup>

510 Insertions with counts above the 85th percentile were identified as “high count insertions.” We  
511 identified 300 bp windows around each high count insertion, and then merged the windows  
512 (bedops -m) to generate high insertion count sites for each replicate. We extracted the sequence  
513 from these windows and attempted to identify *de novo* motifs using MEME (Table S6).<sup>69</sup> We  
514 used AME<sup>69</sup> to determine enrichment of known motifs in the target sequences. For AME,  
515 sequences (300bp: 150bp flanking each high-cut-count insertion site) were compared to a  
516 reference database of motifs.<sup>70</sup> Significance values are given as reported by AME; in summary,  
517 for motif enrichment in target sequences p-values were calculated by one-tailed Fisher exact test  
518 compared to occurrence in 2-mer shuffled control sequences, with Bonferroni correction for the  
519 number of sequences input for each sample. E-values reported by AME represent p-values



520 corrected for the expected number of motifs enriched in the test sequences given the testing of  
521 multiple motifs. (AME results Table S5).

522 A gene target list was generated by identifying the closest gene on either side of the high-cu-  
523 count insertion site. Both genes were included in the final gene list per sample, with duplicate  
524 gene IDs removed (Table S7). The overlap in gene lists for the two replicates of a given  
525 genotype was used as that genotype's final gene list. Gene Ontology enrichment was performed  
526 using gprofiler (default parameters of g:SCS significance threshold multiple testing correction)<sup>71</sup>

527 *RNA-seq of HSF1 variants.*

528 RNA-seq was performed on yeast bearing *HSF1* variants transformed into tet-off *HSF1* yeast.<sup>63</sup>  
529 Early timepoint RNA cultures were collected for transformants of plasmids bearing  
530 *HSF1*(N369Y, E373K), *HSF1*(M380K, M381I), or two independent clones of plasmid rescue  
531 with wild-type *HSF1* (all clones containing silent restriction sites). Clones were grown overnight  
532 at 30°C in C-Leu media and back-diluted the following morning to OD600 0.45. These back-  
533 dilutions were grown for 2hr at 30°C and then ATc was added to a final concentration of 0.1  
534 µg/mL and the cultures were given 4hr more at 30°C. 25mL of this culture was collected for the  
535 “+ATc” sample. Cultures were diluted to OD600 0.1 in C-Leu + 0.1 µg/mL ATc in two sets of  
536 flasks, one of which was placed at 30°C and the other at 37°C. Samples of both 30°C and 37°C  
537 cultures were collected after 15min and after 2hr at their respective temperatures. Collection of  
538 each timepoint was done as follows: 50mL of the cultures was spun 4000 rcf 5 min, the pellet  
539 resuspended in the residual media and transferred to a 1.5mL tube, then spun again at 21130 rcf  
540 for 5min and the supernatant removed, immediately after which the pellet was flash frozen in  
541 liquid nitrogen.

542 RNA was isolated via acid-phenol extraction.<sup>72</sup> RNA was DNase treated with RQ1 DNase  
543 (Promega M6101) by addition of 5 $\mu$ L RQ1 buffer and 5 $\mu$ L RQ1 DNase to each RNA sample,  
544 incubation at 37°C for 45min and then stopping the reaction with 5 $\mu$ L provided stop solution.

545 cDNA was generated with Superscript IV reverse transcriptase (Invitrogen 18090050). 5 $\mu$ g of  
546 RNA was combined with oligo d(T)<sub>18</sub> primers and dNTPs according to manufacturer instructions  
547 and incubated 65°C 5min. Reactions were put on ice 2min and then combined with 4L 5X SSIV  
548 buffer, 1 $\mu$ L 100mM DTT, 1 $\mu$ L RiboLock RNase inhibitor (Thermo Fisher K1622), and 1 $\mu$ L  
549 SuperScript IV reverse transcriptase. The reaction incubated at 55°C for 15min followed by  
550 80°C for 10min before being put on ice. Second strand synthesis was performed with the  
551 NEBNext Second Strand Synthesis module (NEB E6111S). 48 $\mu$ L of nuclease-free water was  
552 added to each tube, followed by 8 $\mu$ L of 10X Second Strand Synthesis reaction buffer and 4 $\mu$ L  
553 Second Strand Synthesis enzyme mix. The reaction incubated at 16°C for 2.5hr, after which the  
554 cDNA was purified using the Zymo Clean & Concentrator kit (Zymo Research D4003).

555 Libraries were generated via tagmentation of cDNA (Illumina FC-121-1030) and sequenced.  
556 Gene Ontology enrichment was performed using g:Profiler (default parameters of g:SCS  
557 significance threshold multiple testing correction) and category list for Fig. 5F condensed with  
558 REVIGO.<sup>71,73</sup>

559

### 560 *Replacement of endogenous HSF1 with HSF1 variants*

561 Integration of *HSF1* variants at the endogenous locus was done using Gibson assembly (NEB  
562 #E2611S) to create clones of three *HSF1* variants: A382C; M380K,M381I; and N369Y,E373K.

563 These versions of *HSF1* had otherwise wild-type sequence and were lacking the restriction sites  
564 introduced in the cloning process of the original deep mutational screen (see above). 664bp of  
565 promoter was included upstream of *HSF1* along with 430bp of downstream sequence before a  
566 *URA3* cassette flanked by homologous recombination arms.<sup>74</sup> The *HSF1* variant plus *URA3*  
567 cassette was amplified using primers with an additional 43bp of *HSF1* downstream sequence  
568 added to the 3' end (Table S10). This PCR product was transformed with lithium acetate into  
569 yeast strain BY4741 and plated on C-Ura. Resulting recombinants were genotyped using PCR  
570 and Sanger sequencing (Table S10). Strains with *URA3* integration but wild-type *HSF1* sequence  
571 were also isolated as matched controls (Fig. S6B). Genotyped strains were then grown on 5-  
572 fluoroorotic acid (5-FOA, 1g/L) to counter select for *URA3* and generate a line with the uracil  
573 auxotrophy. Genomic DNA was extracted (Zymo #D2002) from colonies grown on 5-FOA and  
574 Sanger sequenced to confirm presence or absence of *HSF1* mutation and *URA3* gene.

575

#### 576 *Lithium acetate transformation protocol*

577 One hundred milliliters of culture was grown to approximately OD 1.8. The culture was pelleted  
578 3min 3000rpm. Supernatant was removed and cells were resuspended in 15mL LiSorb (lithium  
579 acetate, 1M sorbitol, Tris, EDTA). Cells were pelleted and resuspended in 15mL LiSorb again,  
580 and then pelleted and resuspended in 1.5mL LiSorb. The cells were split between two 1.5mL  
581 tubes and allowed to incubate with rotation at room temperature for 30min. 200 $\mu$ L of the cell  
582 suspension was added to four tubes, each containing 50 $\mu$ L of 2mg/mL salmon sperm DNA and  
583 3 $\mu$ L DNA for transformation (500ng/ $\mu$ L DMS library or PCR product for integration(84 to  
584 231ng/ $\mu$ L)). 1mL of LiPEG (lithium acetate, Tris, EDTA, 44%PEG) was added and the tubes

585 were allowed to incubate with rotation at room temperature for 30min. 100 $\mu$ L DMSO was added  
586 and the tubes were incubated 42°C for 10min, after which the cells were pelleted 1min 5000rpm,  
587 the supernatant removed, and the pellet resuspended in YPD+0.5M sorbitol. The culture was  
588 allowed to recover at 30C for 1hr. For PCR product transformation, the culture was then pelleted  
589 and plated on C-Ura plates. For DMS library transformation, the cells were added to 400mL C-  
590 Leu media and allowed to grow overnight before concentrating and freezing.

591

## 592 **Data Availability**

593 Expression data are available at the Gene Expression Omnibus (GEO number: pending).

594

## 595 **Acknowledgements**

596 We thank Dr. Kerry Bubb for valuable assistance in data processing. This work was supported  
597 by the National Institutes of Health [Genetic Approaches to Aging Training Grant 4 T32 AG 57-  
598 39] and the National Human Genome Research Institute [Genome Sciences Training Grant 5  
599 T32 HG 35-19] to E.A.M., and also the NSF GRFP and WRF-Hall Fellowship to M.W.D. The  
600 work was also supported by NIH grants GM114166 and 1RM1HG010461 to C.Q. and S.F.

601

## 602 **References**

603 1. Peteranderl, R. *et al.* Biochemical and biophysical characterization of the trimerization

- 604 domain from the heat shock transcription factor. *Biochemistry* **38**, 3559–69 (1999).
- 605 2. Sakurai, H. & Enoki, Y. Novel aspects of heat shock factors: DNA recognition, chromatin  
606 modulation and gene expression. *FEBS J.* **277**, 4140–4149 (2010).
- 607 3. Hajdu-Cronin, Y. M., Chen, W. J. & Sternberg, P. W. The L-type cyclin CYL-1 and the  
608 heat-shock-factor HSF-1 are required for heat-shock-induced protein expression in  
609 *Caenorhabditis elegans*. *Genetics* **168**, 1937–1949 (2004).
- 610 4. Morton, E. A. & Lamitina, T. *Caenorhabditis elegans* HSF-1 is an essential nuclear  
611 protein that forms stress granule-like structures following heat shock. *Aging Cell* **12**, 112–  
612 120 (2013).
- 613 5. Jedlicka, P., Mortin, M. A. & Wu, C. Multiple functions of *Drosophila* heat shock  
614 transcription factor in vivo. *EMBO J.* **16**, 2452–2462 (1997).
- 615 6. Gallo, G. J., Prentice, H. & Kingston, R. E. Heat shock factor is required for growth at  
616 normal temperatures in the fission yeast *Schizosaccharomyces pombe*. *Mol. Cell. Biol.* **13**,  
617 749–761 (1993).
- 618 7. Sorger, P. K. & Pelham, H. R. B. Yeast Heat Shock Factor Is an Essential DNA-Binding  
619 Protein That Exhibits Temperature Dependent Phosphorylation. *Cell* **54**, 855–864 (1988).
- 620 8. Xiao, X. Z. *et al.* HSF1 is required for extra-embryonic development, postnatal growth  
621 and protection during inflammatory responses in mice. *EMBO J.* **18**, 5943–5952 (1999).
- 622 9. Metchat, A. *et al.* Mammalian heat shock factor 1 is essential for oocyte meiosis and  
623 directly regulates Hsp90 $\alpha$  expression. *J. Biol. Chem.* **284**, 9521–9528 (2009).

- 624 10. Hsu, A. L., Murphy, C. T. & Kenyon, C. Regulation of aging and age-related disease by  
625 DAF-16 and heat-shock factor. *Science (80-. )*. **300**, 1142–1145 (2003).
- 626 11. Dai, C., Whitesell, L., Rogers, A. B. & Lindquist, S. Heat Shock Factor 1 Is a Powerful  
627 Multifaceted Modifier of Carcinogenesis. *Cell* **130**, 1005–1018 (2007).
- 628 12. Mendillo, M. L. *et al.* HSF1 drives a transcriptional program distinct from heat shock to  
629 support highly malignant human cancers. *Cell* **150**, 549–562 (2012).
- 630 13. Scherz-Shouval, R. *et al.* The reprogramming of tumor stroma by HSF1 is a potent  
631 enabler of malignancy. *Cell* **158**, 564–578 (2014).
- 632 14. Yin, J. *et al.* piR-823 contributes to colorectal tumorigenesis by enhancing the  
633 transcriptional activity of HSF1. *Cancer Sci.* **108**, 1746–1756 (2017).
- 634 15. Singh, V. & Aballay, A. Heat-shock transcription factor (HSF)-1 pathway required for  
635 *Caenorhabditis elegans* immunity. *Proc. Natl. Acad. Sci. U. S. A.* **103**, 13092–7 (2006).
- 636 16. Inouye, S. *et al.* Impaired IgG production in mice deficient for heat shock transcription  
637 factor 1. *J. Biol. Chem.* **279**, 38701–38709 (2004).
- 638 17. Ma, X. *et al.* Celastrol protects against obesity and metabolic dysfunction through  
639 activation of a HSF1-PGC1 $\alpha$  transcriptional axis. *Cell Metab.* **22**, 695–708 (2015).
- 640 18. Minsky, N. & Roeder, R. G. Direct link between metabolic regulation and the heat-shock  
641 response through the transcriptional regulator PGC-1 $\alpha$ . *Proc. Natl. Acad. Sci. U. S. A.* **112**,  
642 E5669–E5678 (2015).
- 643 19. Jin, X., Qiao, A., Moskophidis, D. & Mivechi, N. F. Modulation of Heat Shock Factor 1

- 644 Activity through Silencing of Ser303/Ser307 Phosphorylation Supports a Metabolic  
645 Program Leading to Age-Related Obesity and Insulin Resistance. *Mol. Cell. Biol.* **38**,  
646 (2018).
- 647 20. Qiao, A., Jin, X., Pang, J., Moskophidis, D. & Mivechi, N. F. The transcriptional regulator  
648 of the chaperone response HSF1 controls hepatic bioenergetics and protein homeostasis. *J.*  
649 *Cell Biol.* **216**, 723–741 (2017).
- 650 21. Li, J., Labbadia, J. & Morimoto, R. I. Rethinking HSF1 in Stress , Development , and  
651 Organismal Health. *Trends Cell Biol.* **27**, 895–905 (2017).
- 652 22. Douglas, P. M. *et al.* Heterotypic Signals from Neural HSF-1 Separate Thermotolerance  
653 from Longevity. *Cell Rep.* **12**, 1196–1204 (2015).
- 654 23. Hahn, J., Hu, Z., Thiele, D. J. & Iyer, V. R. Genome-Wide Analysis of the Biology of  
655 Stress Responses through Heat Shock Transcription Factor. *Mol. Cell. Biol.* **24**, 5249–  
656 5256 (2004).
- 657 24. Pincus, D. *et al.* Genetic and epigenetic determinants establish a continuum of Hsf1  
658 occupancy and activity across the yeast genome. *Mol. Biol. Cell* **29**, 3168–3182 (2018).
- 659 25. Clos, J., Rabindran, S., Wisniewski, J. & Wu, C. Induction temperature of human heat  
660 shock factor is reprogrammed in a Drosophila cell environment. *Nature* **364**, 252–5  
661 (1993).
- 662 26. Hentze, N., Breton, L. Le, Wiesner, J., Kempf, G. & Mayer, M. P. Molecular mechanism  
663 of thermosensory function of human heat shock transcription factor Hsf1. *eLife* **5**, e11576

- 664 (2016).
- 665 27. Soncin, F. *et al.* Transcriptional activity and DNA binding of heat shock factor-1 involve  
666 phosphorylation on threonine 142 by CK2. *Biochem. Biophys. Res. Commun.* **303**, 700–  
667 706 (2003).
- 668 28. Hashikawa, N., Yamamoto, N. & Sakurai, H. Different mechanisms are involved in the  
669 transcriptional activation by yeast heat shock transcription factor through two different  
670 types of heat shock elements. *J. Biol. Chem.* **282**, 10333–10340 (2007).
- 671 29. Satyal, S. H., Chen, D., Fox, S. G., Kramer, J. M. & Morimoto, R. I. Negative regulation  
672 of the heat shock transcriptional response by HSBP1. *Genes Dev.* **12**, 1962–1974 (1998).
- 673 30. Tan, K. *et al.* Mitochondrial SSBP1 protects cells from proteotoxic stresses by  
674 potentiating stress-induced HSF1 transcriptional activity. *Nat. Commun.* **6**, 1–15 (2015).
- 675 31. Neef, D. W., Jaeger, A. M. & Thiele, D. J. Genetic selection for constitutively trimerized  
676 human hsf1 mutants identifies a role for coiled-coil motifs in DNA binding. *G3 Genes,  
677 Genomes, Genet.* **3**, 1315–1324 (2013).
- 678 32. Takemori, Y. *et al.* Mutational analysis of human heat-shock transcription factor 1 reveals  
679 a regulatory role for oligomerization in DNA-binding specificity. *Biochem. J.* **424**, 253–  
680 261 (2009).
- 681 33. Sorger, P. K. & Nelson, H. C. M. Trimerization of a yeast transcriptional activator via a  
682 coiled-coil motif. *Cell* **59**, 807–813 (1989).
- 683 34. Zuo, J., Baler, R., Dahl, G. & Voellmy, R. Activation of the DNA-binding ability of



- 684 human heat shock transcription factor 1 may involve the transition from an intramolecular  
685 to an intermolecular triple-stranded coiled-coil structure. *Mol. Cell. Biol.* **14**, 7557–7568  
686 (1994).
- 687 35. Giardina, C. & Lis, J. T. Dynamic protein-DNA architecture of a yeast heat shock  
688 promoter. *Mol. Cell. Biol.* **15**, 2737–2744 (1995).
- 689 36. Crick, F. H. C. The packing of  $\alpha$ -helices: simple coiled-coils. *Acta Crystallogr.* **6**, 689–  
690 697 (1953).
- 691 37. McLachlan, A. D. & Stewart, M. Tropomyosin coiled-coil interactions: Evidence for an  
692 unstaggered structure. *J. Mol. Biol.* **98**, 293–304 (1975).
- 693 38. Clos, J. *et al.* Molecular cloning and expression of a hexameric *Drosophila* heat shock  
694 factor subject to negative regulation. *Cell* **63**, 1085–1097 (1990).
- 695 39. Peteranderl, R. & Nelson, H. C. M. Trimerization of the Heat Shock Transcription Factor  
696 by a Triple-Stranded  $\alpha$ -Helical Coiled-Coil. *Biochemistry* **31**, 12272–12276 (1992).
- 697 40. Xu, W. *et al.* The influence of the mating type on virulence of *Mucor irregularis*. *Sci. Rep.*  
698 **7**, 1–12 (2017).
- 699 41. Akaza, N. *et al.* *Malassezia globosa* tends to grow actively in summer conditions more  
700 than other cutaneous *Malassezia* species. *J. Dermatol.* **39**, 613–616 (2012).
- 701 42. Vishniac, H. S. & Hempfling, W. P. *Cryptococcus vishniacii* sp. nov., an Antarctic Yeast.  
702 *Int. J. Syst. Bacteriol.* **29**, 153–158 (1979).
- 703 43. van den Brink, J., Facun, K., de Vries, M. & Stielow, J. B. Thermophilic growth and

- 704 enzymatic thermostability are polyphyletic traits within Chaetomiaceae. *Fungal Biol.* **119**,  
705 1255–1266 (2015).
- 706 44. Wang, H., Mayhew, D., Chen, X., Johnston, M. & Mitra, R. D. Calling Cards enable  
707 multiplexed identification of the genomic targets of DNA-binding proteins. *Genome Res.*  
708 **21**, 748–755 (2011).
- 709 45. Zhou, W., Dorrity, M. W., Bubb, K. L., Queitsch, C. & Fields, S. Binding and regulation  
710 of transcription by yeast Ste12 variants to drive mating and invasion phenotypes. *Genetics*  
711 **214**, 397–407 (2020).
- 712 46. Yamamoto, A., Mizukami, Y. & Sakurai, H. Identification of a novel class of target genes  
713 and a novel type of binding sequence of heat shock transcription factor in *Saccharomyces*  
714 *cerevisiae*. *J. Biol. Chem.* **280**, 11911–11919 (2005).
- 715 47. Pali, C. G. *et al.* Differential genomic targeting of the transcription factor TAL1 in  
716 alternate haematopoietic lineages. *EMBO J.* **30**, 494–509 (2011).
- 717 48. Li, C. *et al.* Genome-wide characterization of cis-acting DNA targets reveals the  
718 transcriptional regulatory framework of Opaque2 in maize. *Plant Cell* **27**, 532–545  
719 (2015).
- 720 49. Wang, S. *et al.* Target analysis by integration of transcriptome and ChIP-seq data with  
721 BETA. *Nat. Protoc.* **8**, 2502 (2013).
- 722 50. Opulente, D. A. *et al.* Factors driving metabolic diversity in the budding yeast subphylum.  
723 *BMC Biol.* **16**, 1–15 (2018).

- 724 51. Kurtzman, C., Fell, J. W. & Boekhout, T. *The yeasts: a taxonomic study*. (Elsevier, 2011).
- 725 52. Nover, L. *et al.* Arabidopsis and the heat stress transcription factor world: How many heat  
726 stress transcription factors do we need? *Cell Stress Chaperones* **6**, 177–189 (2001).
- 727 53. Chen, Y., Barlev, N. a, Westergaard, O. & Jakobsen, B. K. Identification of the C-terminal  
728 activator domain in yeast heat shock factor: independent control of transient and sustained  
729 transcriptional activity. *EMBO J.* **12**, 5007–18 (1993).
- 730 54. Jakobsen, B. K. & Pelham, H. R. A conserved heptapeptide restrains the activity of the  
731 yeast heat shock transcription factor. *EMBO J.* **10**, 369–375 (1991).
- 732 55. Puustinen, M. C. & Sistonen, L. Molecular Mechanisms of Heat Shock Factors in Cancer.  
733 *Cells* **9**, 1–20 (2020).
- 734 56. Hashikawa, N., Mizukami, Y., Imazu, H. & Sakurai, H. Mutated yeast heat shock  
735 transcription factor activates transcription independently of hyperphosphorylation. *J. Biol.*  
736 *Chem.* **281**, 3936–3942 (2006).
- 737 57. Jolma, A. *et al.* DNA-dependent formation of transcription factor pairs alters their binding  
738 specificity. *Nature* **527**, 384–388 (2015).
- 739 58. Rohs, R., West, S. M., Sosinsky, A., Liu, P. & Mann, R. S. The role of DNA shape in  
740 protein-DNA recognition. *Nature* **461**, (2009).
- 741 59. Ali, M. H. & Imperiali, B. Protein oligomerization: How and why. *Bioorganic Med.*  
742 *Chem.* **13**, 5013–5020 (2005).
- 743 60. Ulmasov, T., Hagen, G. & Guilfoyle, T. J. Dimerization and DNA binding of auxin

- 744 response factors. *Plant J.* **19**, 309–319 (1999).
- 745 61. Dorrity, M. W., Cuperus, J. T., Carlisle, J. A., Fields, S. & Queitsch, C. Preferences in a  
746 trait decision determined by transcription factor variants. *Proc. Natl. Acad. Sci.* **115**,  
747 E7997–E8006 (2018).
- 748 62. Mumberg, D., Müller, R. & Funk, M. Yeast vectors for the controlled expression of  
749 heterologous proteins in different genetic backgrounds. *Gene* **156**, 119–22 (1995).
- 750 63. Mnaimneh, S. *et al.* Exploration of essential gene functions via titratable promoter alleles.  
751 *Cell* **118**, 31–44 (2004).
- 752 64. Edgar, R. C. MUSCLE: Multiple sequence alignment with high accuracy and high  
753 throughput. *Nucleic Acids Res.* **32**, 1792–1797 (2004).
- 754 65. Crooks, G. E., Hon, G., Chandonia, J.-M. & Brenner, S. E. WebLogo: a sequence logo  
755 generator. *Genome Res.* **14**, 1188–1190 (2004).
- 756 66. Simonetti, F. L., Teppa, E., Chernomoretz, A., Nielsen, M. & Marino Buslje, C. MISTIC:  
757 mutual information server to infer coevolution. *Nucleic Acids Res.* **41**, W8--W14 (2013).
- 758 67. Gietz, R. D. & Woods, R. a. Transformation of yeast by lithium acetate/single-stranded  
759 carrier DNA/polyethylene glycol method. *Methods Enzymol.* **350**, 87–96 (2002).
- 760 68. Hoffman, C. S. & Winston, F. A ten-minute DNA preparation from yeast efficiently  
761 releases autonomous plasmids for transformiaon of Escherichia coli. *Gene* **57**, 267–272  
762 (1987).
- 763 69. Bailey, T. L., Johnson, J., Grant, C. E. & Noble, W. S. The MEME suite. *Nucleic Acids*

- 764            *Res.* **43**, W39--W49 (2015).
- 765    70.    Teixeira, M. C. *et al.* YEASTRACT: an upgraded database for the analysis of  
766            transcription regulatory networks in *Saccharomyces cerevisiae*. *Nucleic Acids Res.* **46**,  
767            D348--D353 (2018).
- 768    71.    Reimand, J. *et al.* g: Profiler—a web server for functional interpretation of gene lists  
769            (2016 update). *Nucleic Acids Res.* **44**, W83--W89 (2016).
- 770    72.    Cuperus, J. T., Lo, R. S., Shumaker, L., Proctor, J. & Fields, S. A tetO Toolkit to Alter  
771            Expression of Genes in *Saccharomyces cerevisiae*. *ACS Synth. Biol.* **4**, 842–852 (2015).
- 772    73.    Supek, F., Bošnjak, M., Škunca, N. & Šmuc, T. Revigo summarizes and visualizes long  
773            lists of gene ontology terms. *PLoS One* **6**, (2011).
- 774    74.    Storici, F. & Resnick, M. A. The delitto perfetto approach to in vivo site-directed  
775            mutagenesis and chromosome rearrangements with synthetic oligonucleotides in yeast.  
776            *Methods Enzymol.* **409**, 329–345 (2006).
- 777    75.    Åkerfelt, M., Morimoto, R. I. & Sistonen, L. Heat shock factors: Integrators of cell stress,  
778            development and lifespan. *Nat. Rev. Mol. Cell Biol.* **11**, 545–555 (2010).
- 779    76.    Littlefield, O. & Nelson, H. C. M. A new use for the 'wing' of the 'winged' helix-turn-helix  
780            motif in the HSF–DNA cocrystal. *Nat. Struct. Mol. Biol.* **6**, 464–470 (1999).
- 781    77.    Cicero, M. P. *et al.* The wing in yeast heat shock transcription factor (HSF) DNA-binding  
782            domain is required for full activity. *Nucleic Acids Res.* **29**, 1715–1723 (2001).

783

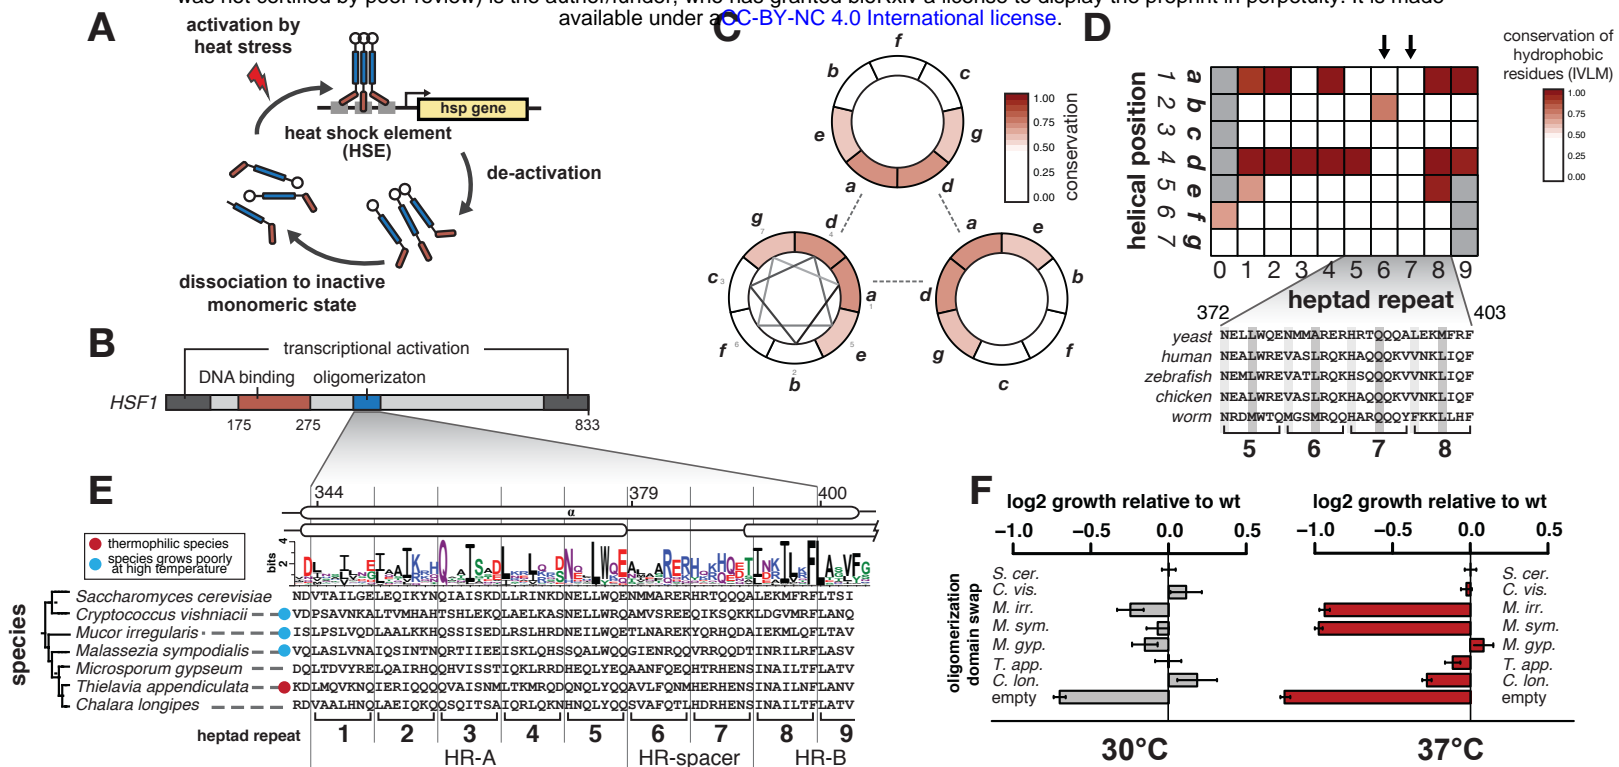

Figure 1.

**Figure 1. The Hsf1 oligomerization domain contributes to temperature-specific fitness and exhibits a conserved interruption of hydrophobic periodicity.** (A) The standard model of induced Hsf1 activity involves conversion from an inactive monomer to a hyper-phosphorylated trimer upon stress exposure. Trimer binding to heat shock elements (HSEs) leads to upregulation of stress response genes such as heat shock proteins (HSP). The cycle is attenuated through multiple mechanisms, including interaction with heat shock proteins and acetylation.<sup>75</sup> (B) The *S. cerevisiae* Hsf1 protein contains N- and C-terminal activation domains along with highly conserved DNA binding and oligomerization domains. (C) The oligomerization domain of Hsf1 has an  $\alpha$ -helical structure (one turn = 3.6 residues). A helical-wheel representation in which each position (labeled *abcdefg*) in the helix is shown, with dotted lines indicating the predicted hydrophobic interactions in the trimer between residues *a* and *d*. Color indicates the degree of mean conservation of sites in the oligomerization domain grouped by helix position among 1229 sequenced fungal species. (D) The conservation of hydrophobic residues (Ile, Val, Leu, Met) in fungal species is broken down by helical position (*a-g*) and by heptad (1-9), showing conservation of hydrophobicity at residues *a* and *d* with the exception of heptads 6 and 7. The sequence of this equivalent region in HSFs from human, zebrafish, chicken, and *C. elegans* is shown below. (E) Six fungal species with Hsf1 oligomerization domains of either high predicted trimer propensity (red dot) or low predicted trimer propensity (blue dot) are shown below a sequence logo plot of this domain generated from fungal species. Two different predictions of  $\alpha$ -helical regions are shown above: separation of the domain into two helices (HR-A and HR-B)<sup>33</sup> or one continuous  $\alpha$ -helix. (F) Amino acids 342-403 of the *S. cerevisiae* Hsf1 were replaced with the oligomerization domain of one of the six fungal species shown in (E). Endogenous *S. cerevisiae* HSF1 was repressed and rescued with one of these chimeric sequences, wild-type *S. cerevisiae* HSF1, or an empty vector control plasmid. Growth at 30°C or 37°C was assayed in a plate reader overnight. Maximum slope of the resulting growth curves relative to the wild-type rescue is presented (error bars represent standard error of the mean for eight technical replicate wells).

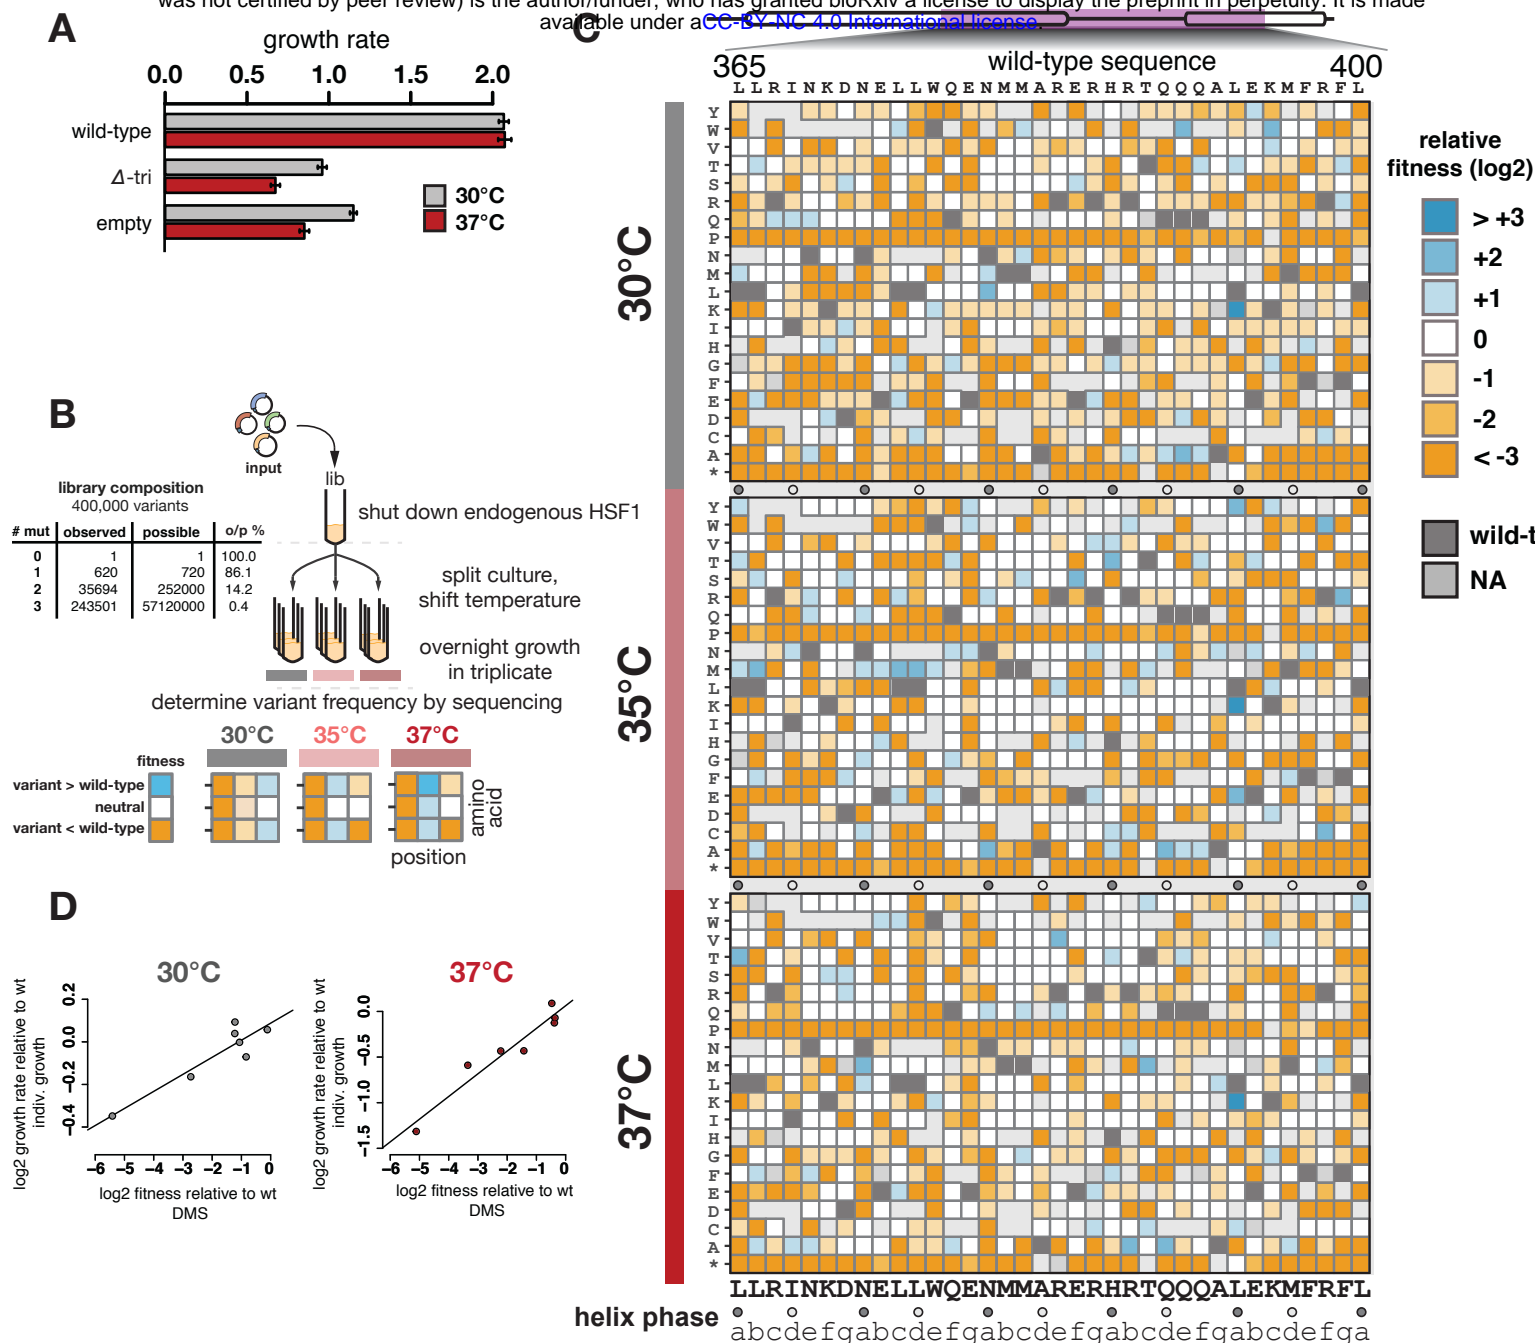

Figure 2.



**Figure 2. A screen of over 400,000 variants in the Hsf1 oligomerization domain reveals positional fitness effects under basal and heat stress conditions.** (A) Yeast endogenous HSF1 was repressed with anhydrotetracycline (ATc) and rescued with plasmid-based expression of either a wild-type *HSF1*, an *HSF1* clone with the oligomerization domain deleted (residues 342-403 deleted), or an empty vector control plasmid. Growth of these strains was assayed overnight in a plate reader held at either 30°C or 37°C. Values on the y-axis represent maximum slope of the resulting growth curves. (B) A deep mutational scan (DMS) was conducted using a library of 400,000 variants in residues 365-400 of the oligomerization domain of a plasmid-based *S. cerevisiae* *HSF1*. This library contained 86% of the possible single residue changes and 14% of all possible double residue changes. The library was transformed into an *S. cerevisiae* strain with tet-off *HSF1* so that endogenous HSF1 could be repressed with ATc. The culture was split into three replicates at each of three temperatures (30°C for 14.5 hours, 35°C for 14.5 hours, or 37°C for 17.5 hours), after which plasmid libraries were extracted and sequenced for frequency. A simulated result output format is shown in (B), wherein a decrease in variant *HSF1* relative to wild type (orange) or an increase in variant *HSF1* frequency relative to wild type (blue) is presented in grid form of residue position by amino acid change, for each of the three temperatures. (C) The relative fitness scores of yeast expressing each single mutation variant in the DMS library are presented as a heat map for growth at 30°C, 35°C, and 37°C. Relative fitness determined as  $\text{variant}(\log_2(37/\text{input})) - \text{wild-type}(\log_2(37/\text{input}))$ , where the input is the composition of the library pre-yeast transformation. Wild-type amino acid sequence is shown above and below the plots, with circles marking residues at helix phase positions *a* and *d*. The region of the oligomerization domain covered in the mutagenesis is diagrammed above (highlighted in purple). Variant L393K showed an enrichment score of >6.6 for all temperatures, making it more likely a sequencing error than a true enrichment. Indeed, L393K failed to show a growth advantage in validation studies (data not shown). The L393K mutation was therefore removed from subsequent analyses. (D) Seven additional *HSF1* single mutants spanning a range of fitness effects were chosen from the library and independently cloned (variants A382P, L375S, I368R, Q389K, N379I, I368L, A392N). These variants were assessed for growth in a plate reader assay as in (A). Their growth relative to wild type is plotted here against their fitness scores in the DMS.

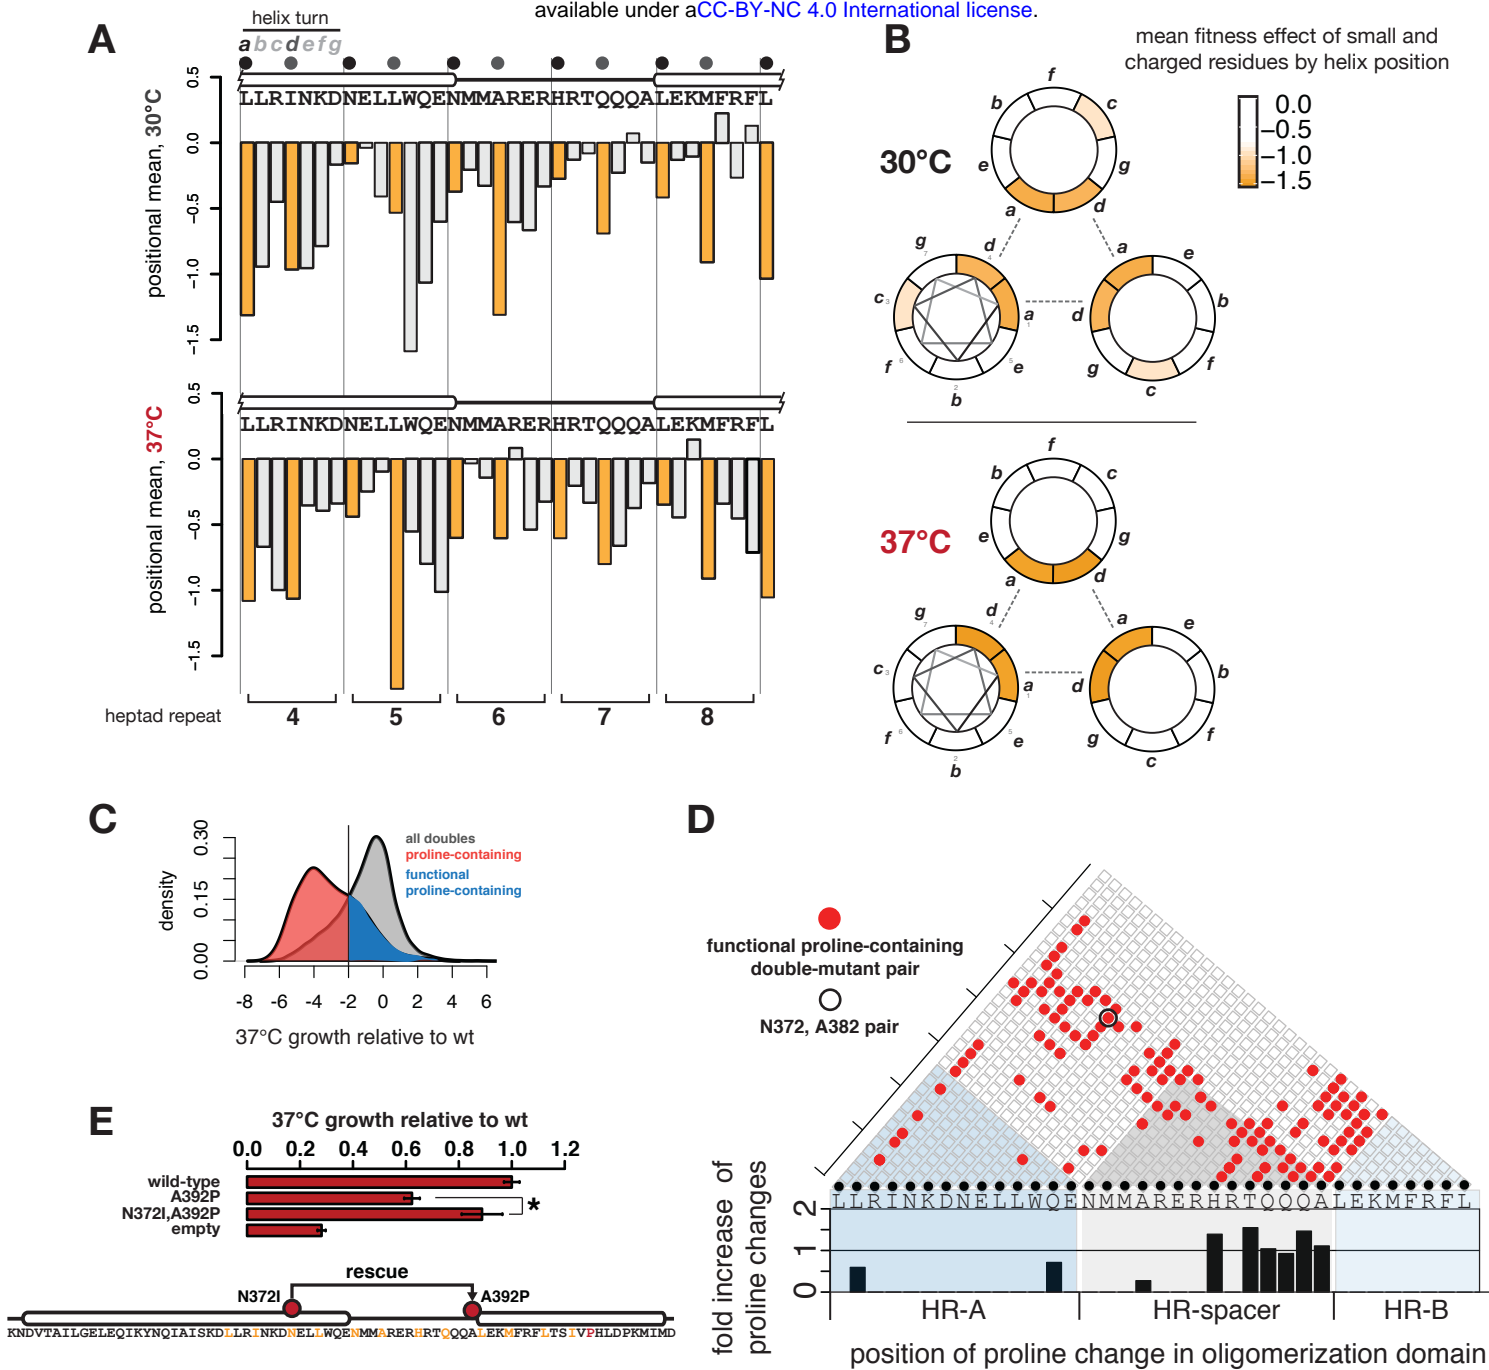

Figure 3.

**Figure 3. Positional effects of Hsf1 variants reveal differing mutational sensitivities for oligomerization domain in the presence and absence of stress.**

(A) Barplots showing the mean ( $\log_2$ ) of fitness scores of all single amino acid changes at each position in the mutagenized region of oligomerization domain under basal (top) and heat-stress (bottom) conditions. Positions in the helical core (*a* and *d*) are colored in orange, and helical positions are indicated above. Boundaries of heptad repeats are shown with vertical lines. (B) Helix loop plots showing the mean effect of single amino changes to small or charged residues (K,R,D,E,S,G), grouped by each of the seven helix positions *a-g*. More deleterious effects are shown in shades of orange. (C) Density histograms show the distribution of 37°C fitness scores for all double mutants (gray) or double mutants that contain at least one proline (red). While the proline-containing distribution is strongly shifted in the negative direction, consistent with their unanimously deleterious effect, a fraction of these double mutants are less deleterious, and their overlap with the non-proline-containing distribution is shown in blue. (D) A pair-wise mutational plot indicates the positions of the pairs of mutations in the less-deleterious group of proline-containing double mutants (blue population in panel C). Above the wild-type sequence, each box represents a possible site pair; red circles indicate pairs found in the set of less-deleterious proline doubles. While this triangular plot does not indicate which of the two sites contributed the deleterious proline, the barplot below indicates the relative frequency of prolines at each individual site in the less-deleterious mutant set. Despite the diversity of positions among the site pairs, the contributing prolines appear highly enriched within the HR-spacer. The absence of other sites containing proline (no bar) indicates that variants at these sites were completely absent in the output population. (E) Growth rate experiments (as in Fig. 2A) independently confirm a proline double mutant identified in the screen whose deleterious effects could be mitigated by a second mutation in HR-A. Growth relative to wild type is compared between strains expressing the proline single mutant (A392P), the double mutant (A392P, N372I), and a negative control with no Hsf1 rescue (empty). A schematic of the location of each mutated position is shown below, with residues at *a* and *d* helix positions marked in orange. (error bars represent standard error of the mean for eight technical replicate wells, \* t-test p-value <0.05)

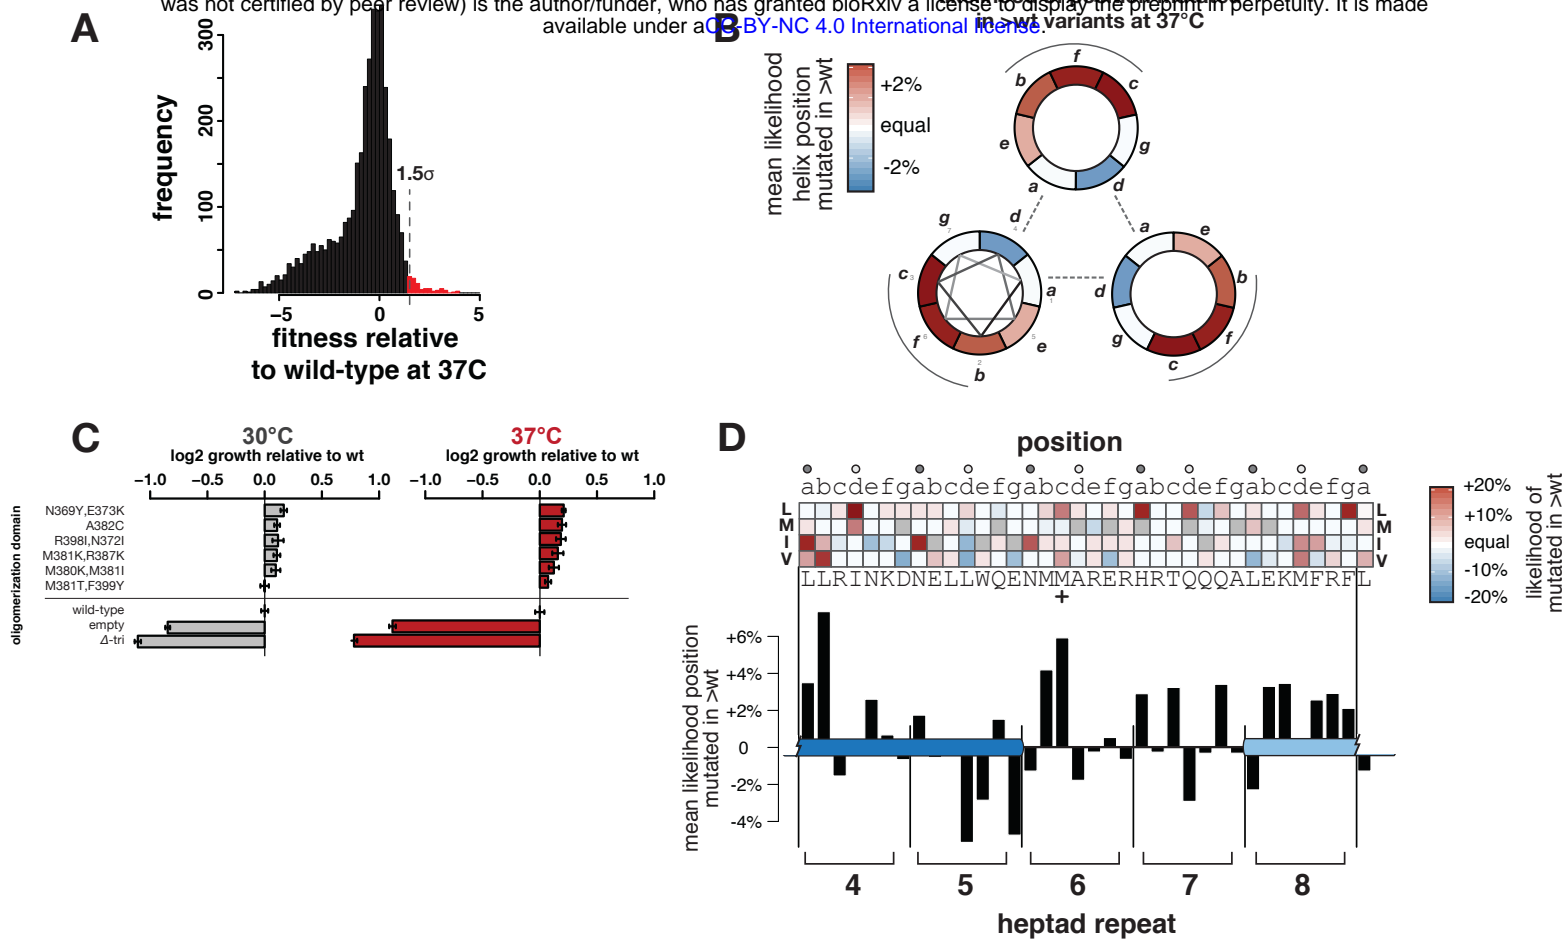

Figure 4.

**Figure 4. Exceptional Hsf1 variants show increased fitness under stress.** (A) The relative fitness scores at 37°C for all variants are presented as a histogram. Exceptional variants were identified as those with fitness scores beyond the indicated 1.5 standard deviation cutoffs (red bars) in terms of fitness relative to wild type. (B) Variants with fitness benefits are enriched at outer helix face positions. Helix position plots reveal the frequency of mutation in this subset of variants, grouped by helix position; red shading represents an enrichment in mutation at that helix position and blue represents a depletion. (C) A set of variants chosen for their growth rate relative to wild-type in the DMS were individually validated (as in Fig. 1F) at basal (left) and heat-shock (right) temperatures. (D) Among the subset of exceptional variants, enrichment for specific substitutions (hydrophobic residues I,V,L,M, y-axis) at each position in the oligomerization domain (x-axis) was analyzed and presented as a heat map (red represents enrichment, blue represents depletion) (See Fig. S10A for full heat map). Helix positions are indicated above the map. The mean enrichment per-site is shown in the barplot below; the most enriched site is at position *b* in HR-A, and the second most enriched site is at position *c* in the HR-spacer (heptad boundaries shown as vertical bars).

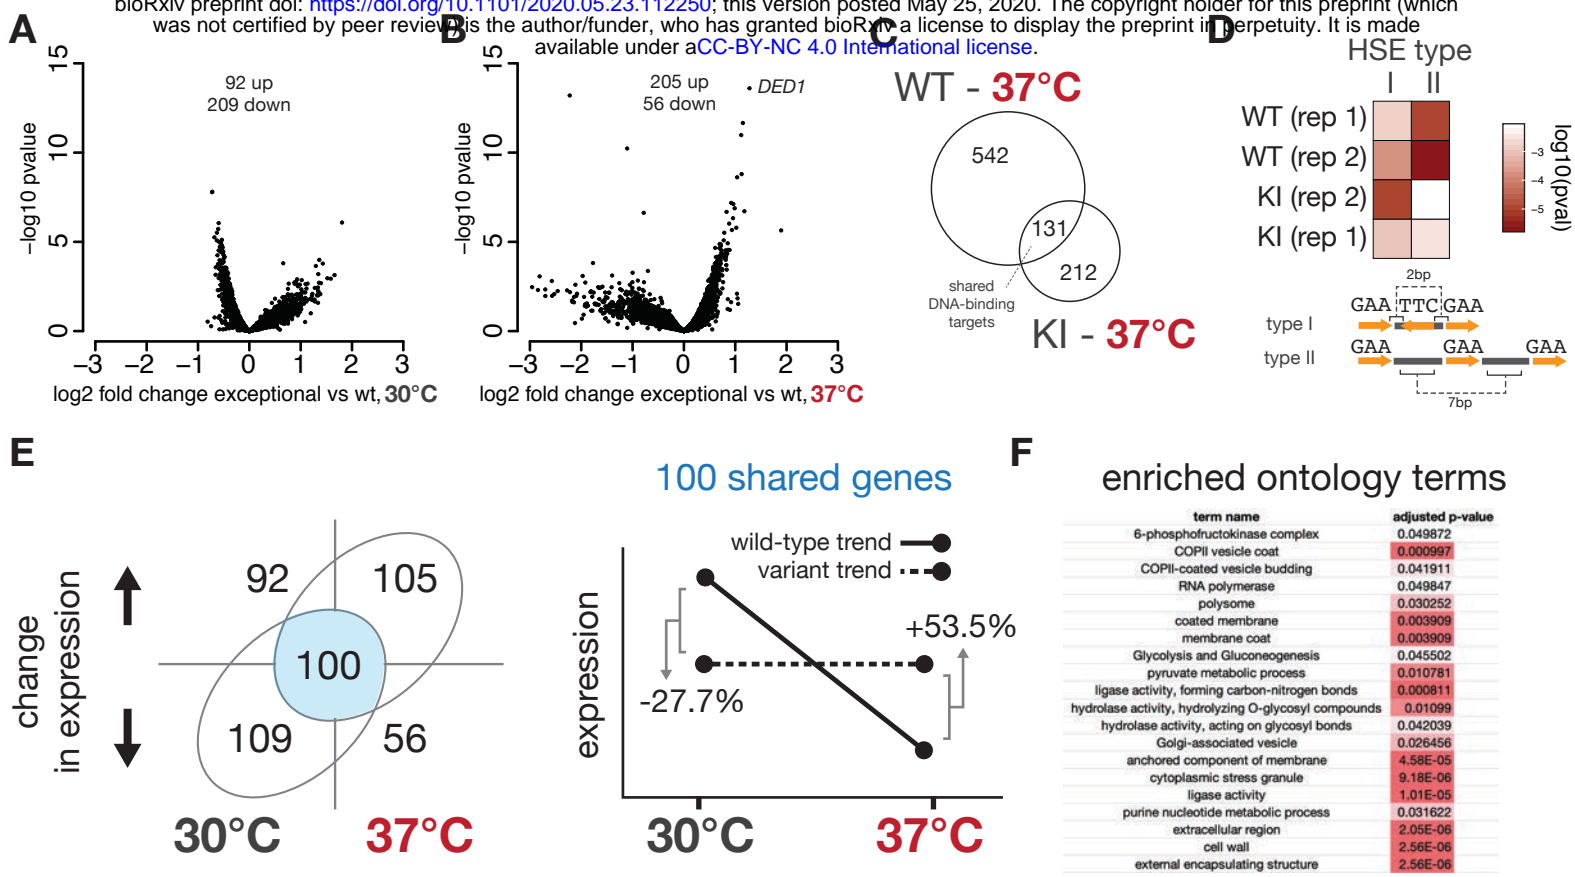

Figure 5.

**Figure 5. Hsf1 variants with enhanced fitness under heat stress show alterations in DNA binding and loss of temperature-dependent regulation of a set of genes.**

RNA-sequencing was performed on yeast with endogenous HSF1 repressed and rescued with a plasmid expressing wild type (two independent clones) or one of two HSF1 variants (N369Y, E373K and M380K, M381I, data treated as replicates in analysis). Results are presented for 120 minutes of growth. (A) For a p-value cutoff of 0.01, 92 genes were differentially upregulated in variants compared to wild type at 30°C and 209 genes were differentially downregulated. (B) At 37°C, 205 genes were differentially upregulated in the variants compared to wild type and 56 genes differentially downregulated. (C) Hsf1 binding at 37°C was assessed using the transposon-insertion-based method “calling card.” The gene on either side of each high-confidence transposon insertion site was determined, tallying 673 total possible gene targets for wild type (WT) and 343 possible gene targets for variant M380K, M381I (KI), of which 131 genes were the same. (D) Motif enrichment for two different HSEs – Type I (GAAnnTTCnnGAA) and Type II (GAAnnnnnnnnGAAnnnnnnnnGAA) – was determined by AME (see methods) from calling card binding data for wild-type (WT) Hsf1 and the M380K, M381I variant (KI) at 37°C. Heat map values represent log<sub>10</sub> of the p-value motif enrichment. The p-values displayed have been Bonferroni corrected for multiple sequences tested. For E-values (adjusted p-values corrected for multiple motifs) see Table S5. (E) In the RNA-seq results at the 120min timepoint, 209 genes were downregulated at 30°C in the variants with enhanced stress resistance relative to wild type. This set overlapped by 100 genes with the 205 genes upregulated in variants relative to wild type at 37°C. Most of the genes in this 100 gene list were targets significantly downregulated in wild type at 37°C compared to 30°C. The right panel of (E) shows a schematized depiction of this general trend, in which these genes are downregulated with heat stress in wild type but show more temperature-consistent expression in variants (N369Y, E373K and M380K, M381I). The average percent difference in expression level for these genes in wild type vs. variants is overlaid on the schematic drawing. (F) Gene ontology analysis revealed categories enriched in the set of 100 genes that have lost the temperature-dependent downregulation.

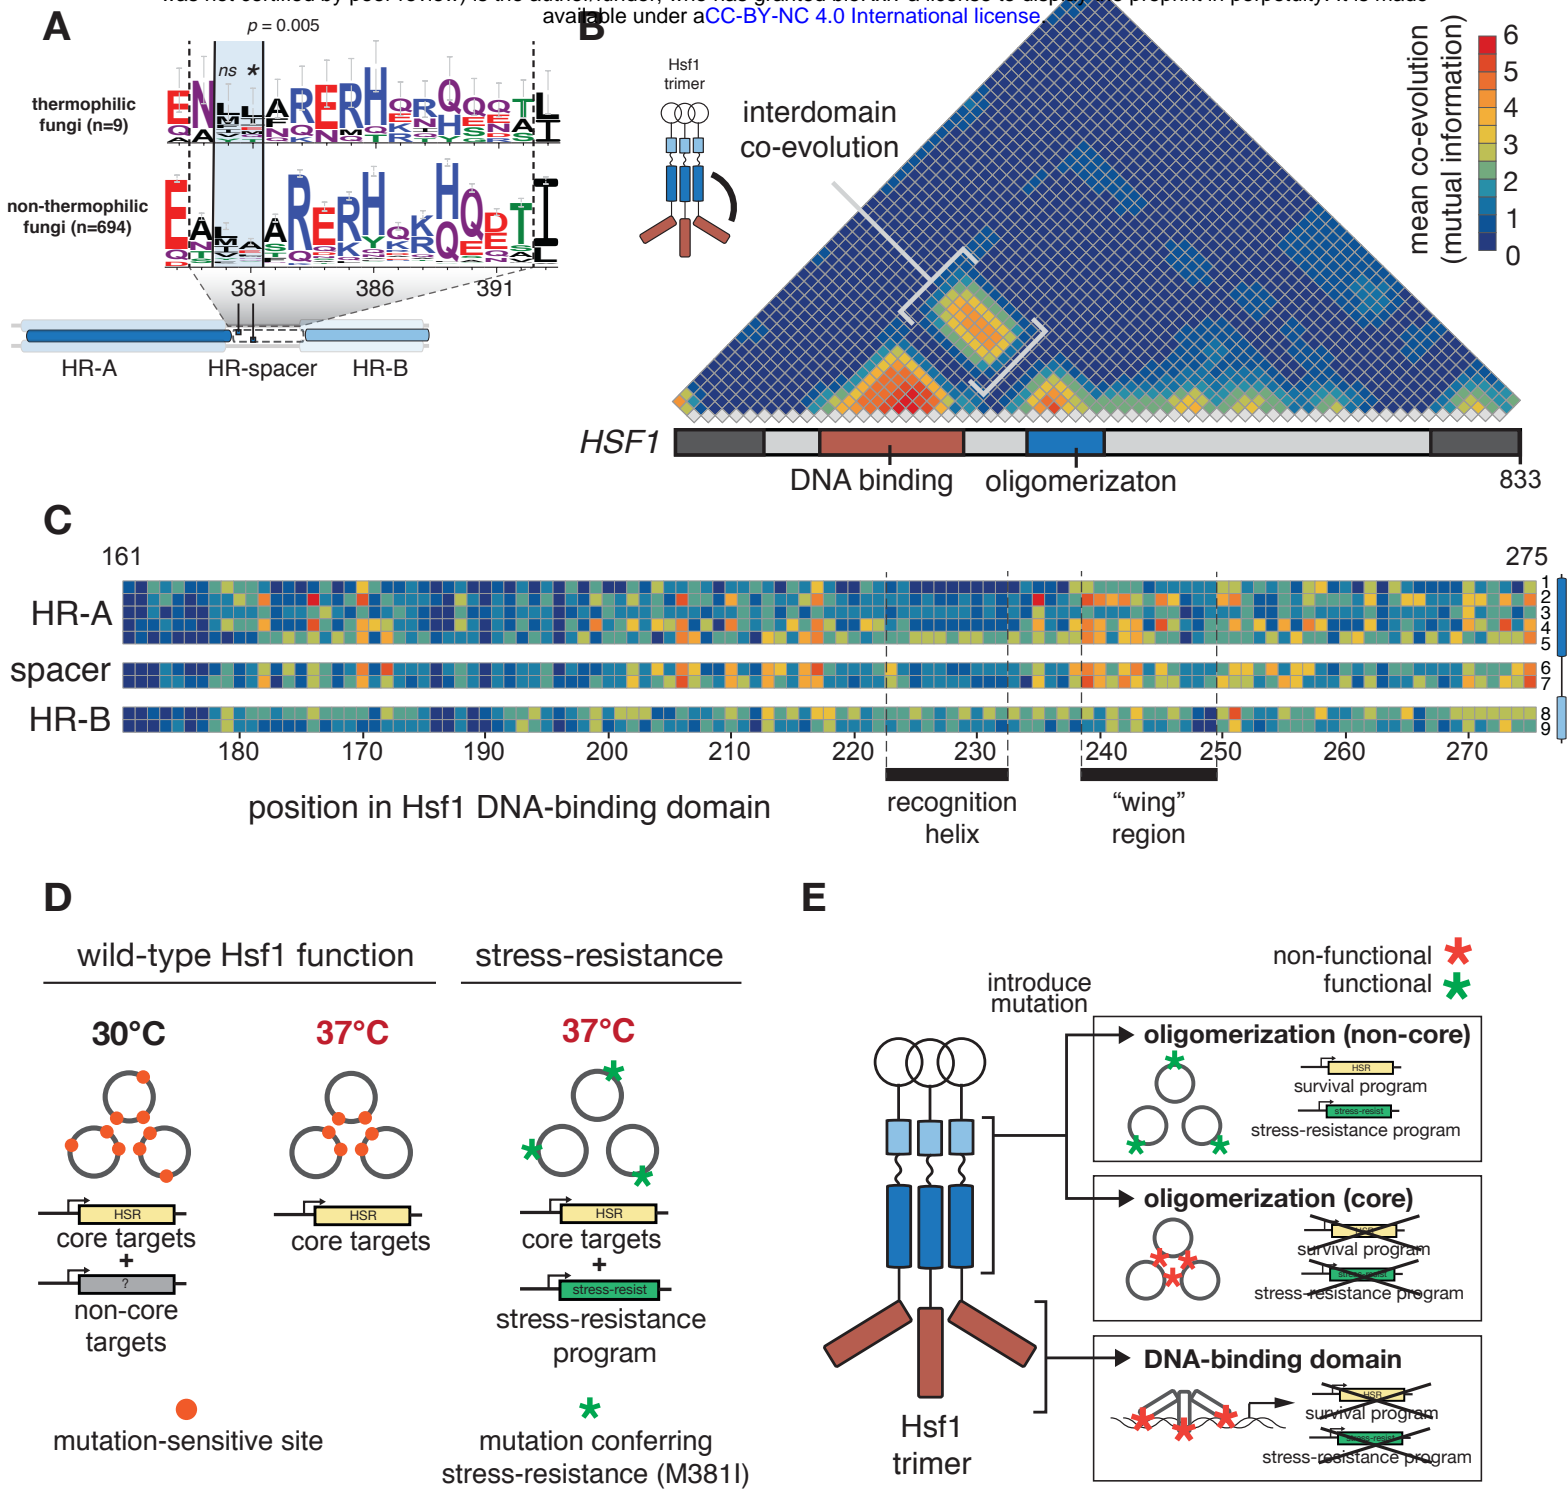

Figure 6.



**Figure 6. Analysis of natural variation in the oligomerization domain of Hsf1 reveals strong co-evolution between the oligomerization and DNA-binding domains.**

(A) Weblogo plots show the relative amino acid preferences within the HR-spacer (bound by dotted lines) for nine thermophilic fungi with a sequenced genome. Among these thermophiles, a significant (Fisher's exact test  $p = 0.005$ ) preference for hydrophobic amino acids (I, V, L, M) was found at the M381 position. The preference for hydrophobic amino acids at the M380 position was not significant (ns). The position of these sites within the oligomerization domain is shown in a schematic (HR-A in dark blue, HR-spacer with dotted lines, and HR-B in light blue). (B) Intramolecular co-evolution at the level of the entire Hsf1 protein was determined using pairwise mutational information between positions in the Hsf1, derived from analysis of Hsf1 protein sequences from 1200 fungal species. The  $833^2$  grid of all-by-all positions pairs was reduced to a  $30^2$  grid (28 aa segments of Hsf1 protein), and the mean mutual information was derived for each bin of pair-wise sites ( $28^2 = 784$  site pairs per cell in heatmap). Binned mutual information values were smoothed with bilinear interpolation of this matrix (resolution = 1.5). Higher levels of mutual information are indicated by warmer colors. Signal near the bottom of the largest triangle indicates co-evolution between proximal residues (see triangle above DNA-binding domain). Within-domain co-evolution can also be observed in the oligomerization domain. The primary between-domain signal occurs the DNA-binding and oligomerization domains (indicated in brackets). (C) A zoom-in on all (non-binned) site pairs between the DNA-binding domain (x-axis) and heptads of the oligomerization domain (y-axis). Key regions of the DNA-binding domain are indicated with black boxes along the x-axis.<sup>76,77</sup> (D) A model schematic showing the overall pattern of mutation-sensitive sites with respect to helix position as determined by deep mutational scanning. Regardless of added temperature stress, positions in the helical core remain sensitive to mutation, while sites outside the helical core show some sensitivity in the absence of stress. The expected transcriptional targets are shown below in each case, with the heat-shock response shown in yellow gene model, and other basal targets shown in grey. In exceptional variants that activate a stress-resistance transcriptional program (green gene model), we observe an abundance of mutations on the outer helix face, away from the helical core. (E) Though exceptional variants showing stress-resistance depend on altering the wild-type transcriptional program of Hsf1, mutations in the DNA-binding domain, or in the helical core of the oligomerization domain are unlikely to retain proper targeting for the core, essential targets of Hsf1, thus leaving the outer helix face of the trimer as a viable path toward altering transcriptional targets.

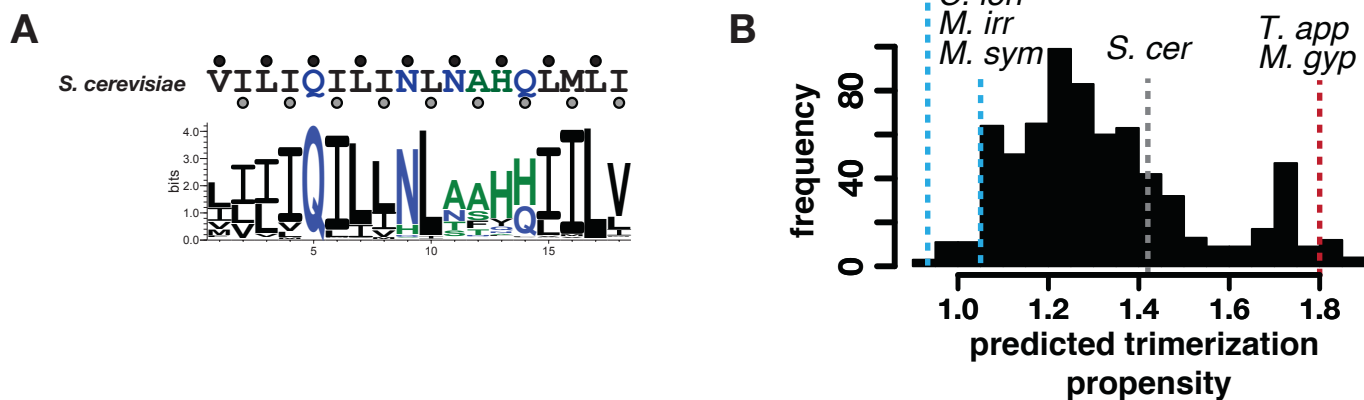

**Supplementary Figure 1. Hsf1 oligomerization domain sequences across fungi conserve hydrophobic residues at a and d positions as well as display differences in predicted trimer propensity.** (A) Logo plot showing the frequency of amino acids at the helical positions a (black dot) and d (grey dot) within the Hsf1 trimerization domain. The wild-type *S. cerevisiae* sequence at these a and d positions is shown above for reference (V344 to I403). (B) Histogram showing LOGICOIL model outputs of trimerization propensity for oligomerization domains of 1229 sequenced fungi. Higher values indicate higher probability of that sequence conferring a trimeric coiled-coil. The prediction score for specific species tested in oligomerization domain swap experiments (Fig 1F) are indicated, along with the prediction for wild-type *S. cerevisiae*.

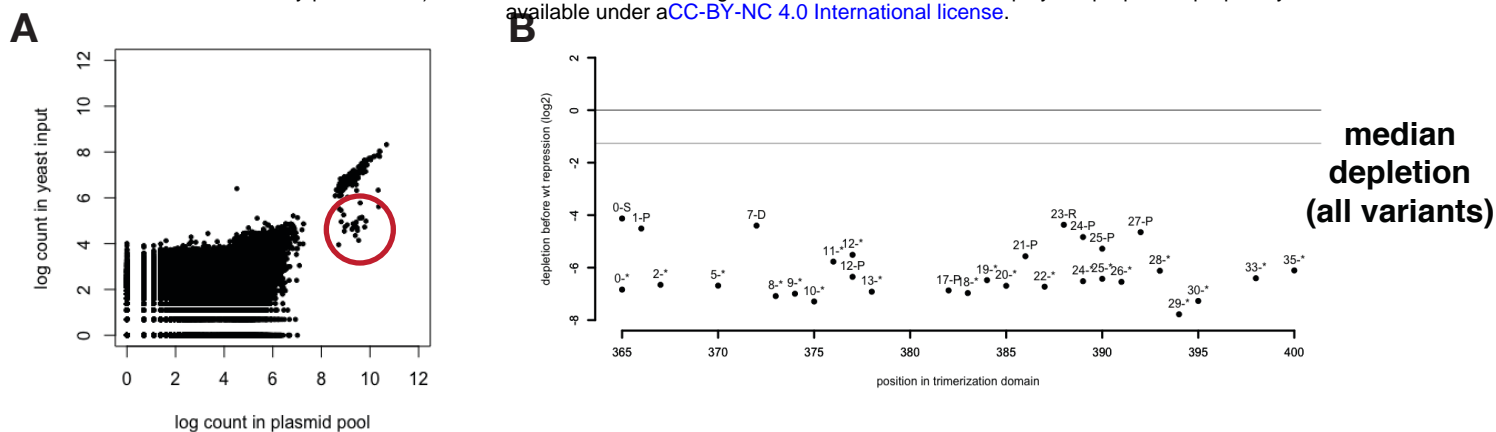

**Supplementary Figure 2. Hsf1 variants depleted in the population prior to repression of endogenous Hsf1 may represent dominant negative missense variants.** (A) Scatterplot showing the frequency of each variant in the plasmid pool before yeast transformation (x-axis) and after yeast transformation and outgrowth without tet-induced repression of native *Hsf1* (y-axis). Variants showing significant depletion (circled in red) while native *Hsf1* is expressed presumably act through dominant negative inhibition of Hsf1. (B) Log<sub>2</sub> fitness scores relative to wild type frequency during outgrowth of circled variants from (A) are plotted against their residue position in the Hsf1 trimerization domain. Gray horizontal line represents the median depletion of the rest of the library. The large majority of these variants represent nonsense mutations.

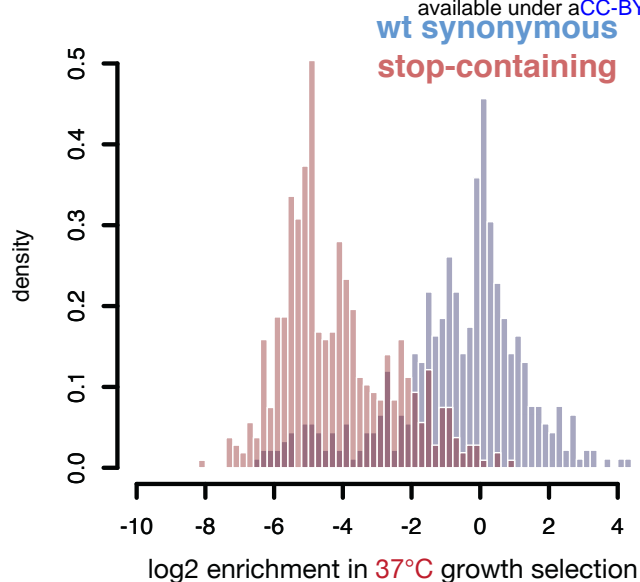

**Supplementary Figure 3. Synonymous Hsf1 variants show enrichment scores centered around zero.** Histograms showing the log<sub>2</sub> fitness scores of variants with synonymous codon changes to wild-type (blue) or variants containing stop codons (red) after growth at 37°C.

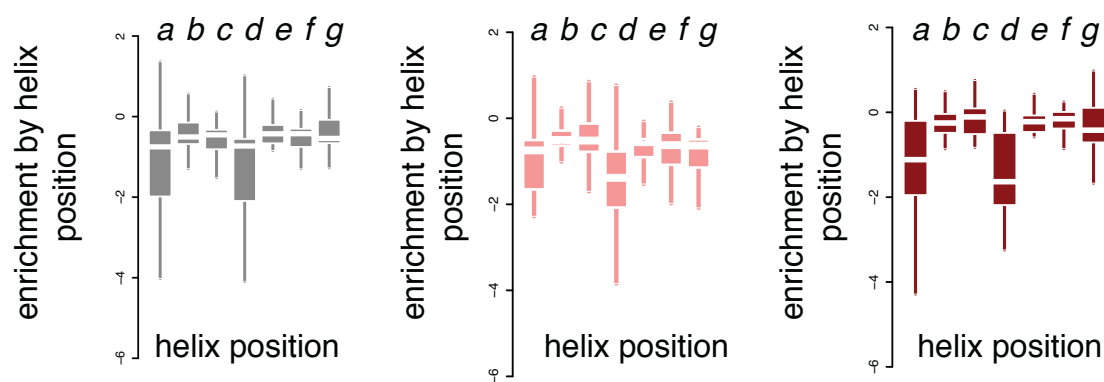

**Supplementary Figure 4. Small or charged substitutions do not have cumulatively negative effects outside of helix positions *a* and *d*.** Boxplots showing log<sub>2</sub> DMS enrichment scores of variants with substitutions to small or charged (K,R,D,E,S,G) residues at each site grouped by helix position (x-axis). Boxplot lines indicate median enrichment scores.

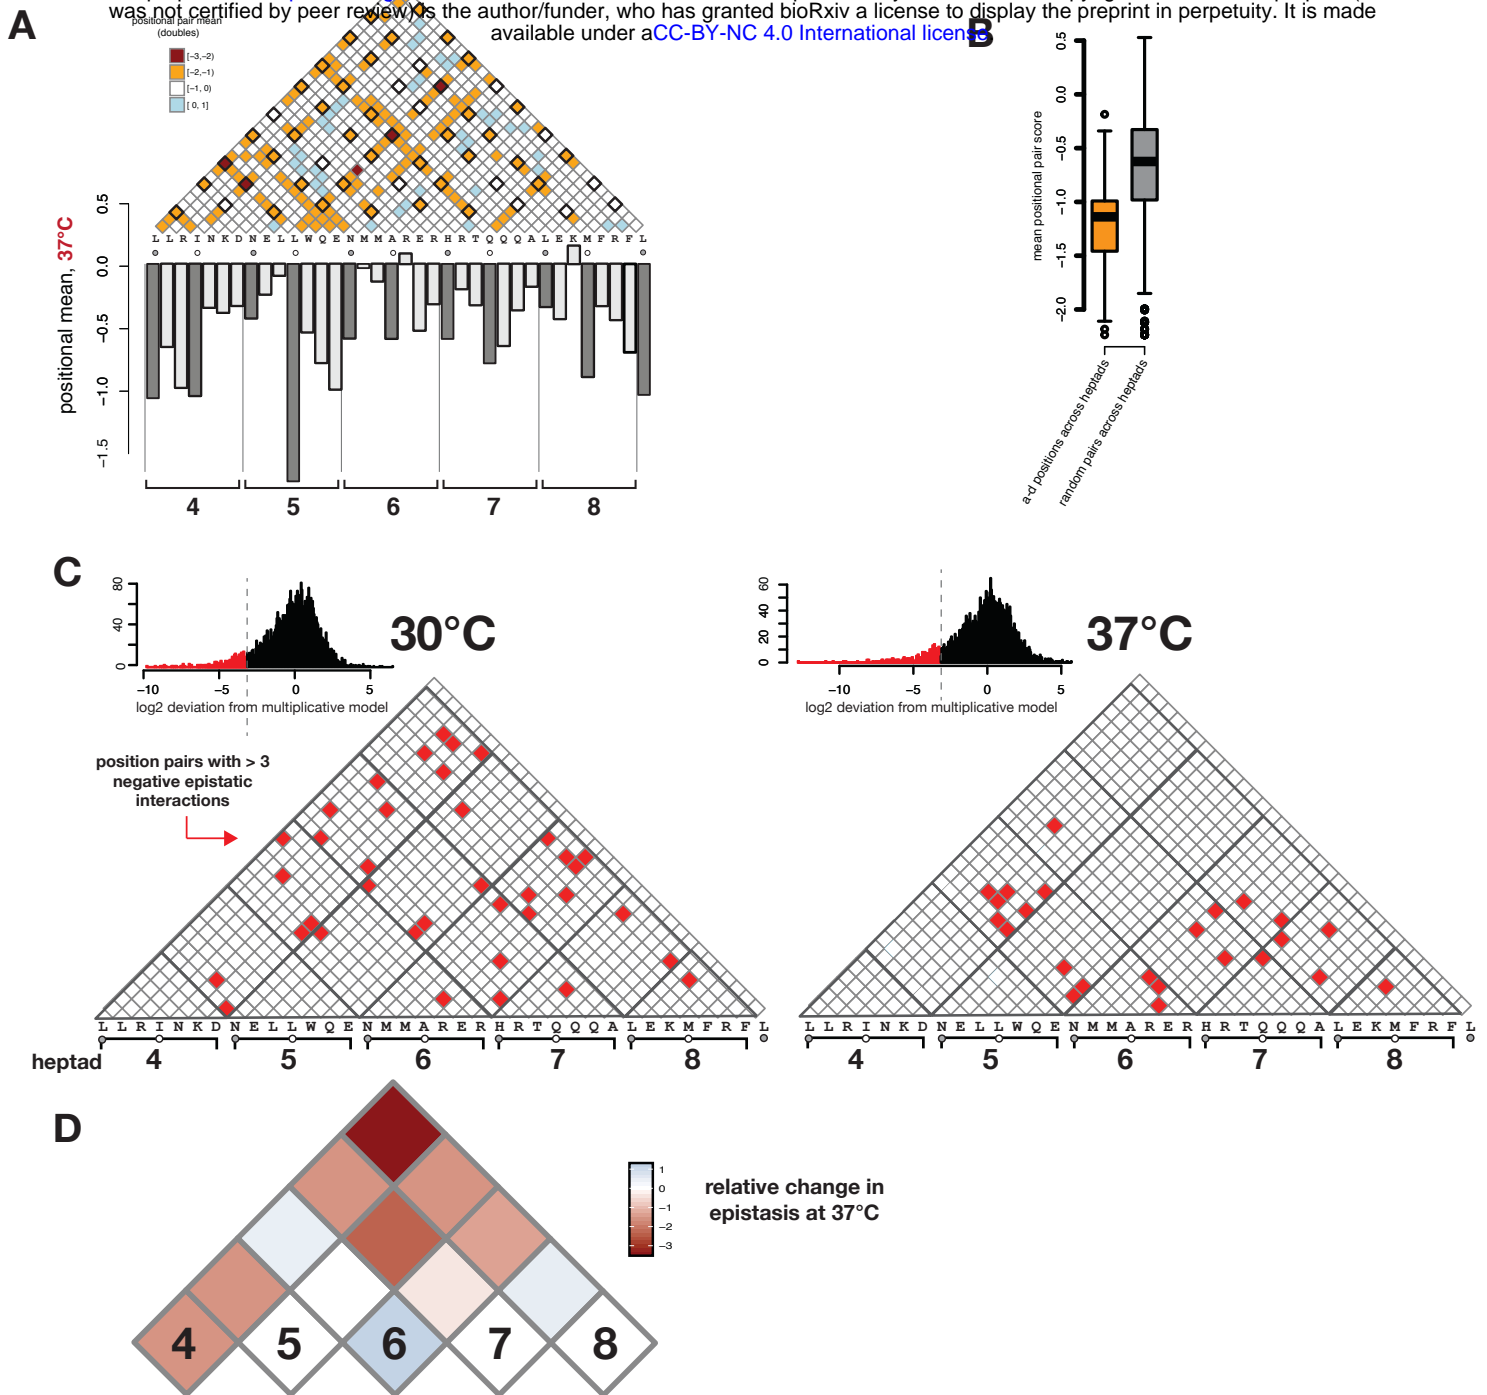

**Supplementary Figure 5. Analysis of double mutants supports the functional role of a and d positions and reveals patterns of epistatically-interacting sites underlying fewer long-distance contacts at 37°C.** (A) Heatmap showing mean enrichment scores at 37°C of all variants found at each pair of sites. Darker shades of orange indicate site pairs for which the double mutants were more deleterious. Positional means generated for single amino acid substitutions at each residue (as in Fig. 3) are shown below for reference, with heptads indicated below. (B) Boxplot showing the mean enrichment scores of double mutants at a-d positions are more deleterious than pairs of mutations at other helix positions. (C) Pairs of sites are marked (red) where >3 double mutants show scores more negative than expected from multiplication of each constituent single (histogram shown above). The pattern of site pairs showing negative epistasis differs between 30°C (left) and 37°C (right). (D) The difference in epistasis scores between the two temperatures is presented as a heat map by heptad (4-8). Epistasis observed at distant heptads (e. g. between heptads 4 and 8) is reduced at 37°C compared to 30°C.

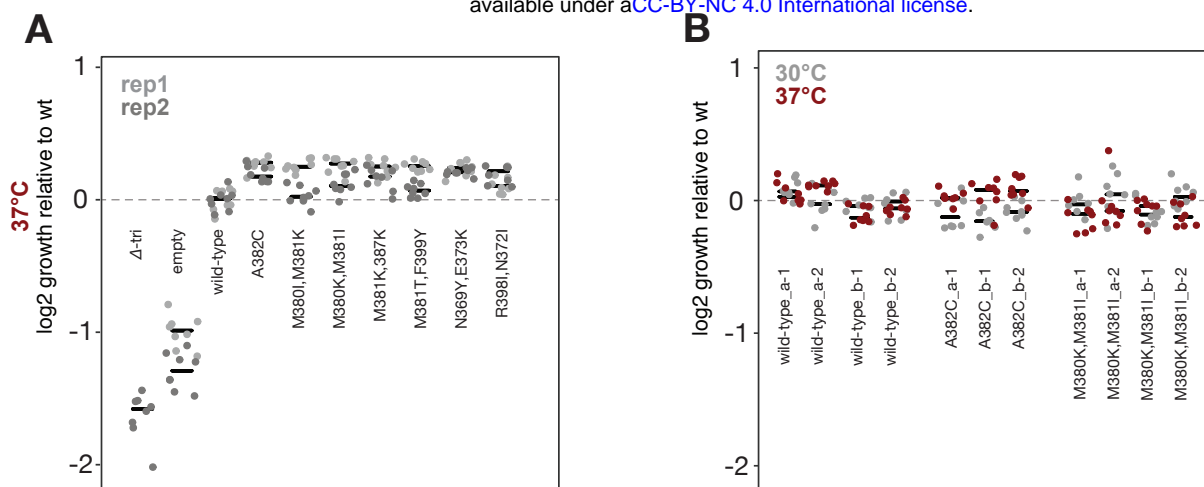

**Supplementary Figure 6. Growth rate validation of variants from large screen.** (A) Seven *HSF1* variants identified in the DMS were independently validated in overnight plate reader growth experiments. *HSF1* variants were expressed in the conditions used during the DMS: endogenous *HSF1* was repressed with ATc and variant *HSF1* was expressed from a plasmid with the native *HSF1* promoter. *HSF1* sequence contained the silent restriction enzyme sites used in DMS cloning. Dots represent technical replicate wells. Rep1 (light gray) and rep2 (dark gray) represent separate experiments performed with independent plasmid transformants. Data from rep2 is reproduced in Fig. 4C. The maximum slope of the growth curves is presented relative to the average rescue of a plasmid expressing wild-type *HSF1*. (B) *HSF1* variants were integrated into the chromosomal *HSF1* locus, under the native promoter and absent the silent restriction cloning sites. Clones from two different integration events were isolated for each genotype using *URA3* marker selection (a and b for each genotype) after which *URA3* was eliminated with counterselection (see Methods) to generate clones 1 and 2 of each integrated genotype. Overnight plate reader growth experiments were performed as above, at temperatures 30°C and 37°C. Individual dots represent technical replicate wells.

**A**

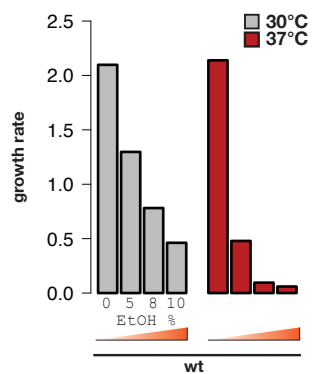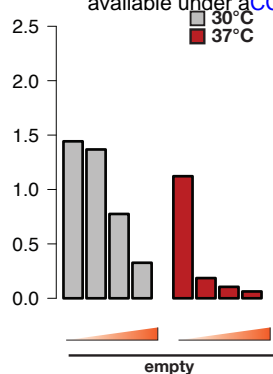

**B**

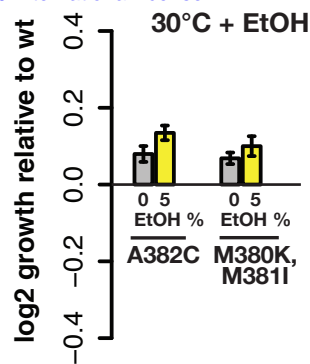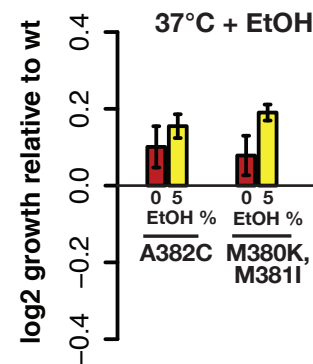

### Supplementary Figure 7. HSF1 variants improve growth under temperature and ethanol stress.

(A) Yeast strains with endogenous HSF1 repressed and rescued with plasmid expression of either wild-type Hsf1 (wt) or an empty vector were grown in the presence of ethanol at 0%, 5%, 8%, or 10%. Overnight growth was assessed in a plate reader at 30°C or 37°C and the maximum growth velocity is presented. (B) Yeast strains were assessed as above but with expression of two different HSF1 variants: A382C and M380K, M381I, both of which were identified for their ability to confer enhanced growth at 37°C (Fig. 4C). The log<sub>2</sub> of their maximum growth velocity relative to wild type is presented for growth in 0% or 5% ethanol at 30°C or 37°C. (Error bars represent standard error of the mean.)



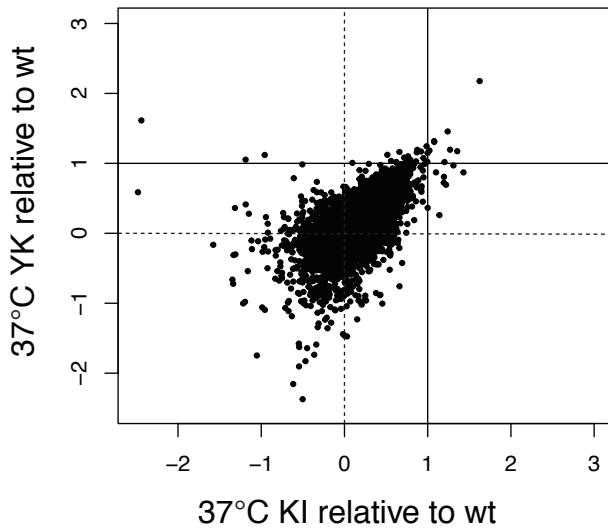

**Supplementary Figure 8. *HSF1* variants conferring enhanced growth phenotype showed similar patterns of upregulated genes under temperature stress.** Scatterplot showing log<sub>2</sub> relative expression level of each gene in M380K,M381I (KI) and N369Y,E373K (YK) variants at 37°C. Dotted guidelines represent no change in expression relative to wild type and solid guidelines indicate 2-fold changes in expression.

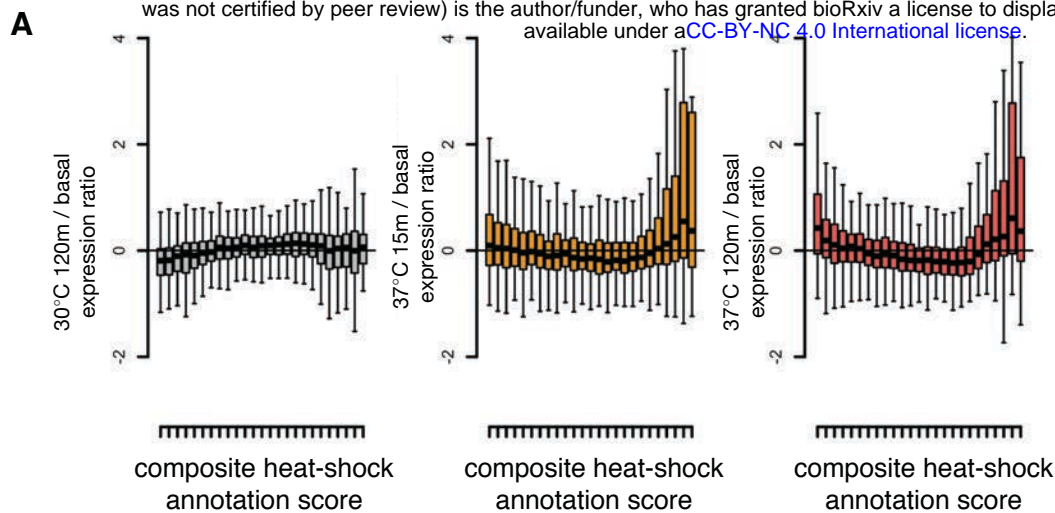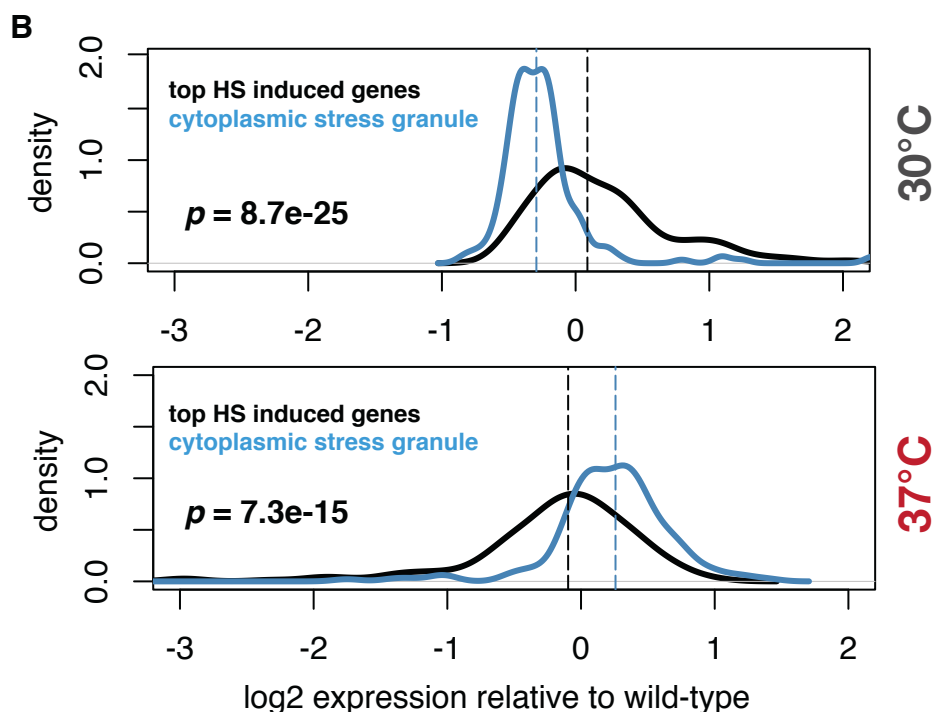

**Supplementary Figure 9. Yeast with expression of wild-type *HSF1* activate a core heat-shock response similar to previous data measuring gene expression in cells shifted to 37°C; variants show similar core heat-shock response but alter expression of cytoplasmic stress granule-related genes at both temperatures.** (A) Boxplots showing the RNA-seq expression levels of genes grouped by their composite rank among several expression studies in the Saccharomyces Genome Database testing 37°C induction. Each bin contains 200 genes, and the highest rank bin (further right on x-axis) includes the genes with the highest 37°C induction across all previous expression studies. For each bin, a boxplot of RNA-seq expression values are shown. The furthest left plot shows the RNA-seq expression values for cells harvested from the 30°C (non-stress) condition 120 minutes after repression of wild-type *HSF1*. In this case, bins containing frequently heat-induced genes show no significant expression increase. In contrast, the middle and right plots showing RNA-seq expression values from the 37°C (stress) condition 15 minutes and 120 minutes after repression of wild-type *Hsf1*, respectively, show increased expression of genes within bins containing the genes most frequently upregulated at 37°C in previous studies. (B) Density histograms showing the expression levels of two key sets of genes expressed in the two *HSF1* variants (M380K,M381I and N369Y,E373K) relative to wild type. One set represents heat-shock induced genes from the top-ranked bin in (A) (black line) and the second represents all genes with the cytoplasmic stress granule annotation (blue line). While expression of cytoplasmic stress granule genes differs from wild type in the exceptional variants at both 30°C and 37°C, expression of the top heat-shock induced genes remains similar.

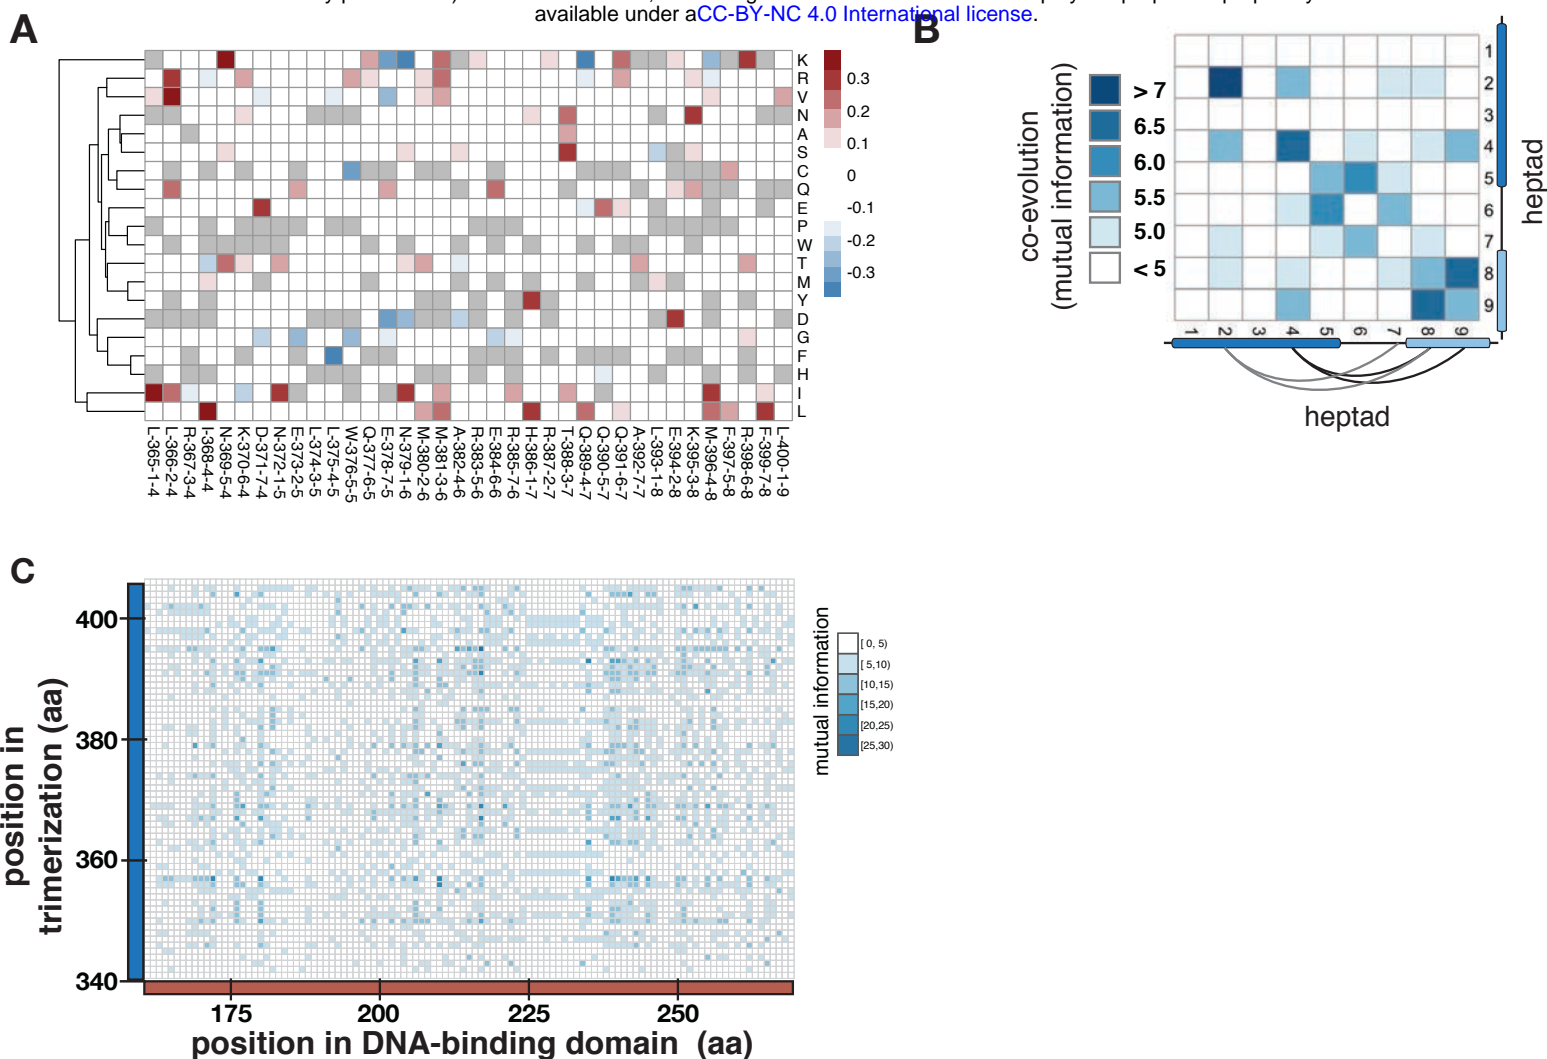

**Supplementary Figure 10. DMS data reveals particular amino acid substitutions enriched among the variants with greater fitness than wild type and analysis of fungal sequences reveals co-evolution across heptads in the oligomerization domain.** (A) The pool of *HSF1* sequence variants that conferred improved growth at 37°C in the DMS was considered (regardless of how many mutations were present in each variant) and broken down by prevalence of any given substitution at each residue. A heatmap showing the frequency of each of these mutations compared to frequency in a random set of variants with near wild-type fitness is presented. Warmer shades indicate changes that are enriched in the exceptional variant population, while cooler shades identify changes that appear less frequently than expected in this group. (B) A mutual information heatmap of co-evolution of the *HSF1* oligomerization domain in the ~1200-species fungal database is presented, considered on the scale of heptads of the oligomerization domain. (C) Heatmap of mutual information between sites specifically in the DNA-binding domain of *Hsf1* (red, x-axis) and the trimerization domain (blue, y-axis). Darker shades of blue in heatmap indicate higher levels of mutual information.
